# Supplementary material for: Socioeconomic and behavioural determinants of overweight/obesity among adults in Botswana: a cross-sectional study
Source: PubMed Central journal article supplement — BMJ Open. 2019 Dec 8;9(12):e029570. doi: 10.1136/bmjopen-2019-029570 (PMC6924755; doi:10.1136/bmjopen-2019-029570), 2019-12-08
Supplement: bmjopen-2019-029570.draft_revisions.pdf [file bmjopen-2019-029570.draft_revisions.pdf]

# BMJ Open

BMJ Open is committed to open peer review. As part of this commitment we make the peer review history of every article we publish publicly available.

When an article is published we post the peer reviewers' comments and the authors' responses online. We also post the versions of the paper that were used during peer review. These are the versions that the peer review comments apply to.

The versions of the paper that follow are the versions that were submitted during the peer review process. They are not the versions of record or the final published versions. They should not be cited or distributed as the published version of this manuscript.

BMJ Open is an open access journal and the full, final, typeset and author-corrected version of record of the manuscript is available on our site with no access controls, subscription charges or pay-per-view fees (<http://bmjopen.bmj.com>).

If you have any questions on BMJ Open's open peer review process please email [info.bmjopen@bmj.com](mailto:info.bmjopen@bmj.com)

# BMJ Open

## Socioeconomic and behavioral determinants of overweight/obesity in Botswana: A cross-sectional study

|                               |                                                                                                                                                                                                                                                                                                                                                                                                                                                                                          |
|-------------------------------|------------------------------------------------------------------------------------------------------------------------------------------------------------------------------------------------------------------------------------------------------------------------------------------------------------------------------------------------------------------------------------------------------------------------------------------------------------------------------------------|
| Journal:                      | <i>BMJ Open</i>                                                                                                                                                                                                                                                                                                                                                                                                                                                                          |
| Manuscript ID                 | bmjopen-2019-029570                                                                                                                                                                                                                                                                                                                                                                                                                                                                      |
| Article Type:                 | Research                                                                                                                                                                                                                                                                                                                                                                                                                                                                                 |
| Date Submitted by the Author: | 31-Jan-2019                                                                                                                                                                                                                                                                                                                                                                                                                                                                              |
| Complete List of Authors:     | Keetile, Mpho; University of Botswana, Population Studies Navaneetham, Kannan; University of Botswana, Population Studies Letamo, Gobopamang; University of Botswana, Population Studies Bainame, Kenabetsho; University of Botswana, Population Studies Rakgoasi, Serai; University of Botswana, Population Studies Gabaitiri, Lesego; University of Botswana, Statistics Masupe, Tiny; University of Botswana, School of Medicine Molebatsi, Robert; University of Botswana, Sociology |
| Keywords:                     | Overweight, Obesity, Socioeconomic, Behavioural, Botswana                                                                                                                                                                                                                                                                                                                                                                                                                                |
|                               |                                                                                                                                                                                                                                                                                                                                                                                                                                                                                          |

SCHOLARONE™  
Manuscripts

1  
2  
3  
4  
5  
6 **Socioeconomic and behavioural determinants of overweight/obesity in**  
7 **Botswana: A cross-sectional study**  
8  
9

10 Mpho Keetile<sup>1</sup>, Kannan Navaneetham<sup>1</sup>, Gobopamang Letamo<sup>1</sup>, Kenabetsho  
11 Bainame<sup>1</sup>, Serai Daniel Rakgoasi<sup>1</sup>, Lesego Gabaitiri<sup>2</sup>, Tiny Masupe<sup>3</sup>, Robert  
12 Molebatsi<sup>4</sup>.  
13  
14

15  
16 **Author Affiliations**  
17

18 <sup>1</sup>Department of Population Studies, University of Botswana, Gaborone, Botswana

19 <sup>2</sup>Department of Statistics, University of Botswana, Gaborone, Botswana

20 <sup>3</sup>School of Medicine, University of Botswana, Gaborone, Botswana

21 <sup>4</sup>Department of Sociology, University of Botswana, Gaborone  
22  
23  
24  
25

26 **Corresponding author**  
27

28 Mpho Keetile, Department of Population Studies, Private Bag 00705, University of  
29 Botswana, Gaborone, Botswana. email: mphokeet@yahoo.com. Tel: +26771231375  
30  
31  
32  
33  
34  
35  
36

37 **Word count: 3507**  
38  
39  
40  
41  
42  
43  
44  
45  
46  
47  
48  
49  
50  
51  
52  
53  
54  
55  
56  
57  
58  
59  
60

## Abstract

### Objective

To undertake a comprehensive assessment of socioeconomic and behavioural determinants of overweight/obesity in Botswana.

### Design

The study adopted a cross-sectional design and was conducted in selected urban and rural areas of Botswana. Rural areas constituted 15 urban villages and 15 rural areas, while urban areas constituted 1 city and 2 towns. Body Mass Index (BMI) was categorized into; underweight ( $\text{BMI} < 18.5 \text{ kg/m}^2$ ), normal weight ( $18.5 \leq \text{BMI} < 25 \text{ kg/m}^2$ ), overweight ( $25 \leq \text{BMI} < 30 \text{ kg/m}^2$ ) and obese ( $\text{BMI} \geq 30 \text{ kg/m}^2$ ). We used binary logistic regression analysis to estimate determinants of overweight/obesity because overweight and obese were coded as: being overweight and obese ( $\text{BMI} \geq 25$ ) = 1; not overweight and obese = 0 ( $\text{BMI} < 25$ ). Analysis of questionnaire responses used logistic regression models.

### Setting

Botswana

### Participants

1178 males and females aged 15 years and above from the survey on 'Chronic Non communicable Diseases in Botswana: Chronic disease prevalence, Health Care Utilization, Health Expenditure and the Life course', conducted in March 2016.

### Outcome Measures

Adjusted ORs for socioeconomic and behavioural determinants of overweight/obesity.

## Results

Prevalence of overweight/obesity in the study population was estimated at 41%. The adjusted odds of overweight/obesity were highest among women (AOR=2.74, 95% C.I. =1.92-3.90), in ages 55-64 years (AOR=5.53, 95% C.I. = 2.62-11.6), individuals with secondary (AOR=1.70, 95% C.I. = 1.11-2.61) and tertiary or higher education (AOR=1.99, 95% C.I. =1.16-3.38), smokers (AOR=2.16, 95% C.I. = 1.22-3.83) and poor physically active people (AOR=1.46, 95% C.I. =1.03-3.24).

## Conclusion

Being female, elderly, of high education levels, a smoker and having poor physical activity were identified as key factors for prevalence of overweight/obesity. These findings suggest the need for broad based strategies encouraging physical activity among different socioeconomic groups.

## Key words

**Overweight, Obesity, socioeconomic, behavioral, Botswana**

### Strengths and Limitations of the study

- To our knowledge this is the first cross-sectional study in Botswana to comprehensively assess both the socioeconomic and behavioral determinants of overweight/obesity among adults.
- Data were collected from a large and randomly selected representative population. The data contained information on potential confounding factors, with a low proportion of missing information.
- A limitation for this study was that since a cross sectional design was employed, data on each participant was recorded only once making it difficult to infer the temporal association between an explanatory and an outcome variable.
- Only an association, and not causation, can be inferred from this study.

## Introduction

The disease profile in Botswana is changing at an alarming rate, with most deaths and disability in the foreseeable future likely to be accounted for by the ominous epidemics of non-communicable diseases (NCDs) such as heart disease, stroke, cancer and other chronic diseases. Children, adults and the elderly are all vulnerable to the risk factors that contribute to NCDs especially overweight/obesity, due to unhealthy diets, low physical activity, exposure to tobacco smoke and/or the effects of the harmful use of alcohol<sup>1-3</sup>. The key drivers of NCDs are ageing, rapid unplanned urbanisation, and the globalisation of unhealthy lifestyles. For example, globalization of unhealthy lifestyles like unhealthy diets may show up in individuals as raised blood pressure, increased blood glucose, elevated blood lipids, and overweight/ obesity<sup>1</sup>.

Several studies have recently shown that many low income and middle-income countries (LMICs) are experiencing an increase in the prevalence of overweight/obesity<sup>4-6</sup>. This prevalence is predicted to continue to increase in the future. Much of the increase in prevalence levels for overweight/obesity is expected in countries such as India, some parts of South-East Asia, China, most of South America and some parts of Sub Saharan Africa<sup>7-8</sup>. Until recently, SSA was minimally affected by the obesity/overweight epidemic due to under-nutrition and a major burden of HIV and tuberculosis<sup>9</sup>. Meanwhile research on overweight/obesity has started to gain significance in sub Saharan Africa<sup>10-14</sup> due to its increasing magnitude.

It has been shown by previous studies that socioeconomic and behavioural factors have a significant association with overweight/obesity<sup>15-16</sup>. These studies have

1  
2  
3 shown that socioeconomic factors such as sex, age, education level, work status,  
4 place of residence and wealth status are significant determinants of  
5 overweight/obesity. It has also been found that women are more likely to be  
6 overweight/obese than men, while the odds of being overweight/obesity has been  
7 seen to increase with age<sup>17-19</sup>. Other studies have shown that being employed in a  
8 high income job, residing in urban areas, having high education and wealth status is  
9 significantly associated with overweight/obesity<sup>20</sup>.

10  
11  
12  
13  
14  
15  
16  
17  
18  
19  
20  
21 There is also available evidence which suggest significant correlation between  
22 behavioural factors and overweight/obesity. For example, there is significant  
23 evidence of a positive association between physical inactivity and the prevalence of  
24 overweight/obesity<sup>21</sup>. It has also been suggested that the relation between physical  
25 activity and health outcomes such as overweight/obesity may be moderated by a  
26 number of lifestyle factors, especially sedentary lifestyle<sup>15, 20, 21</sup>. In many developing  
27 countries, there has been a substantial shift from jobs with high-energy expenditure  
28 such as farming, mining, and forestry, and employment is inclined towards the more-  
29 sedentary sectors of manufacturing, services and office based-work<sup>22</sup>. Moreover,  
30 there have been changes in lifestyle behaviours condoning alcohol consumption,  
31 poor diets and smoking. These are also key risk factors of overweight/obesity<sup>23-24</sup>.

32  
33  
34  
35  
36  
37  
38  
39  
40  
41  
42  
43  
44  
45  
46  
47  
48  
49 Despite evidence indicating increasing burden of overweight/obesity in Botswana,  
50 there is little evidence of socioeconomic and behavioural determinants of  
51 overweight/obesity. To the best of our knowledge this is the first cross sectional  
52 study which takes into account both socioeconomic and behavioural factors for  
53 understanding the heterogeneity of overweight/obesity in Botswana. The reduction  
54  
55  
56  
57  
58  
59  
60



1  
2  
3 of overweight/obesity prevalence should be a key goal of health-care policy because  
4 of its association with many NCDs. The main objective of this study was to assess  
5 socioeconomic and behavioural determinants associated with overweight/obesity  
6 prevalence in Botswana.  
7  
8  
9  
10  
11  
12  
13  
14

## 15 **Methods**

16  
17  
18 The study used cross sectional design by selecting respondents in three cities and  
19 towns, fifteen urban villages and fifteen rural areas across Botswana using a  
20 multistage probability sampling technique. The survey was carried out in March  
21 2016. The survey collected self-reported data on several NCDs as classified by the  
22 WHO classification of diseases and their risk factors. Information collected from  
23 these respondents included social and behavioural characteristics, and  
24 anthropometric measurements (height and weight). Body Mass Index (BMI) was  
25 used to classify overweight/obesity in adults. BMI was derived from weight and  
26 height:  $\text{weight (kg)} / (\text{height (m)} \times \text{height (m)})$ . Participants removed their shoes and  
27 heavy outer clothing before weight and height were measured. Weight was  
28 measured, to the nearest 0.1kg, while height was measured in metres. BMI was  
29 categorized into; underweight ( $\text{BMI} < 18.5 \text{ kg/m}^2$ ), normal weight ( $18.5 \leq \text{BMI} < 25$   
30  $\text{kg/m}^2$ ), overweight ( $25 \leq \text{BMI} < 30 \text{ kg/m}^2$ ) and obese ( $\text{BMI} \geq 30 \text{ kg/m}^2$ ). Overweight and  
31 obese were used to create a binary outcome variable which was coded as: being  
32 overweight/obese ( $\text{BMI} \geq 25$ ) =1; not overweight/obese =0 ( $\text{BMI} < 25$ ).  
33  
34  
35  
36  
37  
38  
39  
40  
41  
42  
43  
44  
45  
46  
47  
48  
49  
50  
51  
52  
53  
54  
55  
56  
57  
58  
59  
60

## Patient and Public involvement

Since this was a cross-sectional study respondents were drawn from the general population rather than from healthcare settings, thereby providing access to all eligible people aged 15 years and above. As part of the study protocol all respondents were requested to sign a consent form and were told that participation in the study was voluntary. It was also highlighted to respondents that only the general findings of the study shall be shared to insure confidentiality.

## Measurement of variables

Information for NCD risk factors was collected through self-reports. For tobacco smoking - the survey question asked respondent: 'Do you currently smoke any tobacco products such as cigarettes, cigars or pipes? This variable was coded such that yes=1 and no=0. Alcohol consumption was derived from the question: 'Have you ever consumed alcohol in the past 30 days?' This variable was used because in Botswana, it has been observed that alcohol consumers are heavy drinkers<sup>25</sup>. The resultant variable was yes=1 and no=0. For poor physical activity, four key features of the quality of physical activity measures (e.g. activity type, intensity, frequency, and duration) are usually considered when choosing one for a research study. For this study the following two questions asking respondents about moderate and vigorous intensity physical activity were used. Activity at work asked the following questions: "Does your work involve vigorous-intensity activity that causes large increases in breathing or heart rate like [examples] for at least 10 minutes continuously?" and "Does your work involve moderate-intensity activity that causes small increases in breathing or heart rate such as brisk walking for at least 10 minutes continuously?". Different types of responses to the two levels of physical

1  
2  
3 activities have been grouped together and given a value based on the intensity of  
4 the activity. The resultant variable was coded such that those who responded  
5 'yes'=1 (physically active) and those who said 'no' were coded=0 (or poor physically  
6 active).  
7  
8  
9  
10  
11  
12  
13  
14  
15

16 For the measurement of insufficient or non-consumption of fruits and vegetables the  
17 following question was asked to assess fruit and vegetable consumption in the  
18 population; "How many servings of fruits do you eat on one of those days (on a  
19 typical day)?" and "How many servings of vegetables do you eat on one of those  
20 days (On a typical day)". The resultant variable was coded such that people who  
21 reported to have taken more than 5 servings of fruit and vegetables were given a  
22 code, sufficient intake=0 and those who reported to have taken less than 5 servings  
23 were given a code insufficient intake=1. This was done based on the general  
24 recommendation by the WHO panel on diet, nutrition and chronic disease prevention  
25 that considers poor fruit/vegetables intake as having less than 5 servings of fruits  
26 and vegetables in a day.  
27  
28  
29  
30  
31  
32  
33  
34  
35  
36  
37  
38  
39  
40

41 A wealth index (WI) was constructed to be a measure of wealth status. WI is a  
42 composite measure of, typically, indicators of ownership of consumer durables,  
43 housing characteristics, and access to public services. Information on a range of  
44 durable assets was collected during the survey (e. g. car, refrigerator, television,),  
45 housing characteristics (e. g. material of dwelling floor and roof, main cooking fuel),  
46 access to basic services (e. g. electricity supply, source of drinking water, sanitation  
47 facilities) and ownership of livestock (e.g. cattle, goats, sheep, horses, chickens).  
48 Further to collection of information on durable assets, information on land and  
49 livestock ownership was collected. Principal component analysis was employed to  
50  
51  
52  
53  
54  
55  
56  
57  
58  
59  
60

1  
2  
3 derive the wealth index variable, which had five categories from the 1<sup>st</sup> to the 5<sup>th</sup>  
4  
5 quintile (poorest to richest).  
6  
7

### 8 **Control variables**

9  
10  
11 Age and place of residence were used as control variables. These variables were  
12  
13 conceptualized to have an association with the outcome variable. Therefore to hold  
14  
15 their likely association with the outcome variable, they are included in the combined  
16  
17 effects model, so that the association between the independent variables becomes  
18  
19 isolated and discernible.  
20  
21  
22

### 23 **Statistical analysis**

24  
25  
26 Data analysis involved descriptive and multivariable analysis. Descriptive analysis  
27  
28 provided some basis for further exploration of key determinants of overweight and  
29  
30 obesity in Botswana. In the binary logistic regressions, outcome variables were  
31  
32 coded as '1' if respondent was overweight/obese and '0' if they were not  
33  
34 overweight/obese. Results of logistic regression analysis were presented together  
35  
36 with adjusted odds ratios (AOR), 95% confidence intervals (CI) and significance  
37  
38 levels. Data analysis was done using SPSS version 25 program. In order to control  
39  
40 for cluster effects complex samples module in SPSS has been used since the NCDs  
41  
42 survey used multistage sampling technique.  
43  
44  
45  
46

## 47 **Results**

### 48 ***Sample characteristics***

49  
50  
51  
52  
53 Table 1 presents results on the sample description for the respondents. The results  
54  
55 show that a total of 1,178 respondents between the ages of 15 years and above  
56  
57 were successfully interviewed. The sample constituted a high proportion of females  
58  
59  
60

1  
2  
3 (69.1%) than males (30.9%). The sample age distribution suggests a relatively  
4 young study population, with over half (59%) of the sample being less than 39 years  
5 of age, and almost three quarters (73.5%) being less than fifty years of age. As age  
6 increases, the sample sex distribution becomes more skewed in favour of females,  
7 from just fewer than 6 in every ten among those in the 20-24 years age group, to  
8 over 7 and 8 out of every ten among respondents over 40 years of age.  
9  
10  
11  
12  
13  
14  
15  
16  
17  
18  
19  
20  
21  
22  
23  
24  
25  
26  
27  
28  
29  
30  
31  
32  
33  
34  
35  
36  
37  
38  
39  
40  
41  
42  
43  
44  
45  
46  
47  
48  
49  
50  
51  
52  
53  
54  
55  
56  
57  
58  
59  
60

For peer review only

Table 1: Sample Characteristics

| Variable                                   | %            | N           |
|--------------------------------------------|--------------|-------------|
| <b>Sex</b>                                 |              |             |
| Male                                       | 30.9         | 364         |
| Female                                     | 69.1         | 813         |
| <b>Total</b>                               |              | <b>1177</b> |
| <b>Age in years</b>                        |              |             |
| <24                                        | 26.4         | 270         |
| 25– 34                                     | 29.5         | 302         |
| 35 – 44                                    | 19.2         | 196         |
| 45– 54                                     | 12.7         | 130         |
| 55 – 64                                    | 7.3          | 75          |
| 65+ years                                  | 4.9          | 50          |
| <b>Total</b>                               | <b>100</b>   | <b>1023</b> |
| <b>Locality Type</b>                       |              |             |
| Cities/Towns                               | 30.2         | 355         |
| Urban Villages                             | 45.4         | 534         |
| Rural Settlements                          | 24.5         | 288         |
| <b>Total</b>                               | <b>100.0</b> | <b>1177</b> |
| <b>Marital Status</b>                      |              |             |
| Never Married                              | 73.8         | 864         |
| Currently married                          | 17           | 199         |
| Formerly married                           | 9.2          | 108         |
| <b>Total</b>                               | <b>100.0</b> | <b>1171</b> |
| <b>Highest Level of Education Attained</b> |              |             |
| Primary or Less                            | 35.5         | 410         |
| Junior Secondary                           | 27.2         | 314         |
| Senior Secondary                           | 17.3         | 200         |
| Tertiary & Over                            | 19.9         | 230         |
| <b>Total</b>                               | <b>100.0</b> | <b>1154</b> |
| <b>Work Status in past 12 months</b>       |              |             |
| Public Sector                              | 10.5         | 122         |
| Private Sector                             | 15.7         | 182         |
| Self Employed                              | 11.2         | 130         |
| Not Employed                               | 37.5         | 436         |
| Homemaker-Student                          | 18.8         | 218         |
| Retired-Other                              | 6.4          | 74          |
| <b>Total</b>                               | <b>100.0</b> | <b>1162</b> |
| <b>Wealth status</b>                       |              |             |
| Lowest                                     | 19.9         | 234         |
| Second                                     | 20.1         | 237         |
| Middle                                     | 19.9         | 235         |
| Fourth                                     | 20.1         | 237         |
| Highest                                    | 19.9         | 235         |
| <b>Total</b>                               | <b>100.0</b> | <b>1178</b> |

1  
2  
3  
4  
5 More than two fifths (45.4%) of the population resided in urban villages; just under a  
6  
7 third (30.2%) resided in cities and towns while a quarter (24.5%) resided in rural  
8  
9 areas and settlements. Almost three quarters (73.8%) of respondents were never  
10  
11 married; over a third (35.5%) had primary education or less; over a quarter (27.2%)  
12  
13 had junior secondary education while just under a fifth had senior secondary  
14  
15 education (17.3%) and tertiary education and over (19.9%). Close to two fifth  
16  
17 (37.5%) of respondents were not employed; while over a quarter were employed in  
18  
19 either the public (10.5%) or private sector (15.7%). Just over one in every ten  
20  
21 (11.2%) were self-employed, while close to a fifth (18.8%) were either home makers  
22  
23 or students; while only 6.4 per cent were retired from work.  
24  
25  
26  
27  
28  
29

30 Table 2 below shows behavioural characteristics of the study population. It shows  
31  
32 that prevalence of alcohol consumption was estimated at 17% while tobacco  
33  
34 smoking was estimated at 11.5%. However, since prevalence rate for smoking  
35  
36 represents active smokers and not passive (second-hand smokers) it may be a  
37  
38 misrepresentation of the effects of tobacco smoking in the general population. Poor  
39  
40 physical activity was also high in the study population with 48.9% of respondents  
41  
42 indicating that they were physically inactive. Poor fruit and vegetable (FV)  
43  
44 consumption calculated based on the general recommendation by the WHO panel  
45  
46 on diet, nutrition and chronic disease prevention that considers poor fruit/vegetables  
47  
48 intake as having less than 5 servings of fruits and vegetables in a week was  
49  
50 estimated at 82.5%.  
51  
52  
53  
54  
55  
56  
57  
58  
59  
60

Table 2: Behavioural characteristics of the study population

| Variable                           | %    | N           |
|------------------------------------|------|-------------|
| <b>Smoking?</b>                    |      |             |
| Yes                                | 11.5 | 136         |
| No                                 | 88.5 | 1042        |
| <b>Total</b>                       |      | <b>1178</b> |
| <b>Alcohol consumption</b>         |      |             |
| Yes                                | 17.3 | 204         |
| No                                 | 82.7 | 974         |
| <b>Total</b>                       |      | <b>1178</b> |
| <b>Poor physical activity</b>      |      |             |
| Yes                                | 48.9 | 576         |
| No                                 | 51.1 | 602         |
| <b>Total</b>                       |      | <b>1147</b> |
| <b>Fruit and vegetable intake?</b> |      |             |
| Poor fruit/vegetable intake        | 82.5 | 1045        |
| Sufficient intake                  | 17.5 | 133         |
| <b>Total</b>                       |      | <b>1178</b> |

### ***Prevalence of overweight/obesity***

Estimated prevalence of overweight/obesity in the sampled study population was 41.3% (Table 3). There were significant gender differences in prevalence of overweight/obesity. It was found that women than men (48.6% in women, 25.5% in men) were found to be overweight/obese. It was observed that individuals residing in rural areas (46.8%), public sector employee (55.2%) and those with lower education (45%) showed high prevalence rates for overweight/obesity. However, it was found that wealth status was not significantly linked with overweight/obesity. Among



1  
2  
3 behavioural factors this study offers evidence that non-smoker (42.9%) showed high  
4 prevalence rates of overweight/obesity. Meanwhile alcohol consumption, poor  
5 physical activity and poor FV consumption did not show any significant association  
6 with overweight and obesity.  
7  
8  
9  
10  
11  
12  
13  
14  
15  
16  
17  
18  
19  
20  
21  
22  
23  
24  
25  
26  
27  
28  
29  
30  
31  
32  
33  
34  
35  
36  
37  
38  
39  
40  
41  
42  
43  
44  
45  
46  
47  
48  
49  
50  
51  
52  
53  
54  
55  
56  
57  
58  
59  
60

For peer review only

Table 3: Prevalence of overweight/obesity by socioeconomic and behavioural characteristics of the study population

| Variable                   | %    | N   | P-value |
|----------------------------|------|-----|---------|
| <b>Sex</b>                 |      |     |         |
| Male                       | 25.5 | 364 | 0.000** |
| Female                     | 48.6 | 813 |         |
| <b>Age</b>                 |      |     | 0.000** |
| ≤24                        | 21.8 | 270 |         |
| 25-34                      | 36.8 | 302 |         |
| 35-44                      | 53   | 196 |         |
| 45-54                      | 54.5 | 130 |         |
| 55-64                      | 61.8 | 75  |         |
| 65+                        | 43.8 | 50  |         |
| <b>Marital status</b>      |      |     | 0.000** |
| Never-married              | 35.5 | 864 |         |
| Currently-married          | 62.2 | 199 |         |
| Formerly-married           | 54.1 | 108 |         |
| <b>Education</b>           |      |     | 0.019** |
| Primary or less            | 45.4 | 410 |         |
| Secondary                  | 36.7 | 514 |         |
| Tertiary or higher         | 44.6 | 230 |         |
| <b>Residence</b>           |      |     | 0.008** |
| Cities and towns           | 37.9 | 355 |         |
| Urban villages             | 41   | 534 |         |
| Rural villages             | 46.8 | 288 |         |
| <b>Work status</b>         |      |     | 0.000** |
| Public sector              | 52.2 | 122 |         |
| Private sector             | 36.8 | 182 |         |
| self-employed              | 55   | 130 |         |
| Not employed               | 45.8 | 436 |         |
| Home-maker/student         | 29.4 | 218 |         |
| Retired/other              | 40.3 | 74  |         |
| <b>Wealth status</b>       |      |     | 0.765   |
| Lowest                     | 38.8 | 234 |         |
| second                     | 43.2 | 237 |         |
| middle                     | 41.1 | 235 |         |
| Fourth                     | 39.7 | 237 |         |
| Highest                    | 44.1 | 235 |         |
| <b>Alcohol consumption</b> |      |     | 0.445   |
| No                         | 33.3 | 766 |         |
| yes                        | 37.7 | 412 |         |
| <b>Smoking</b>             |      |     | 0.004** |
| Yes                        | 29.7 | 136 |         |

|                                         |             |             |       |
|-----------------------------------------|-------------|-------------|-------|
| No                                      | 42.9        | 1042        |       |
| <b>Poor physical activity</b>           |             |             | 0.547 |
| Yes                                     | 41.5        | 376         |       |
| No                                      | 39.6        | 771         |       |
| <b>Poor fruit/vegetable consumption</b> |             |             | 0.832 |
| No                                      | 41.9        | 133         |       |
| yes                                     | 43          | 1045        |       |
| <b>Overall</b>                          | <b>41.3</b> | <b>1178</b> |       |

Note: \*\*Statistically significant at  $p \leq 0.05$ .

### ***Determinants of overweight/obesity***

Table 4 indicates results of the logistic regression model for overweight/obesity with socioeconomic and behavioural factors. One unadjusted and two adjusted models were run. Model I assessed the association between overweight/obesity and each of the socioeconomic variables and behavioural factors, Model II assessed the association between overweight/obesity adjusting for socioeconomic factors, while Model III assess the association between overweight/obesity adjusting for both socioeconomic and behavioural factors. It was observed that gender was a significant correlate of overweight/obesity when controlling for both socioeconomic and behavioural factors. Women were observed to be 2 times (AOR=2.74, 95% C.I. =1.92-3.90) more likely to be overweight/obese than men.

It was also found that the odds of being overweight/obese increased with age after controlling for socioeconomic and behavioural factors and were highest among individuals aged 55-64 years (AOR=5.53, 95% C.I. = 2.62-11.6), but declined at ages 65+ years (AOR=2.88, 95% C.I. = 1.21-6.86). Education was also a found to be a significant factor associated with overweight/obesity in the study population

1  
2  
3 after controlling for socioeconomic covariates. It was found that individuals who had  
4 secondary (AOR=1.70, 95% C.I. = 1.11-2.61) and tertiary or higher (AOR=1.99, 95%  
5 C.I. =1.16-3.38) education were more likely to be overweight/obese than individuals  
6 with primary or less education. Meanwhile, there was no significant relationship  
7 observed between work status, wealth status and overweight/obesity in the general  
8 study population.  
9  
10  
11  
12  
13  
14  
15  
16  
17  
18  
19

20 It was found that in the crude model for the association between a risk factor and  
21 overweight/obesity only smoking (OR=0.56, C.I. =0.37-0.83) and alcohol  
22 consumption (OR=0.66, C.I. =0.47-0.91) were found to be negatively associated with  
23 overweight/obesity. Meanwhile, poor physical activity and fruit and vegetable  
24 consumption did not show any significant association with overweight/obesity.  
25 Adjustment for other socioeconomic variables and risk factors suggested that  
26 variations in smoking accounted for part of the socioeconomic variation in  
27 overweight/obesity. For instance it was noted the odds of overweight/obesity  
28 increased two times (AOR=2.16, 95% C.I. = 1.22-3.83) among smokers than non-  
29 smokers. Overweight/obesity was also significantly associated with poor physical  
30 activity (AOR=1.46, 95% C.I. =1.03-3.24) after adjustment for both socioeconomic  
31 and behavioural factors.  
32  
33  
34  
35  
36  
37  
38  
39  
40  
41  
42  
43  
44  
45  
46  
47  
48  
49  
50  
51  
52  
53  
54  
55  
56  
57  
58  
59  
60

Table 4: Odds ratios for the association between overweight/obesity, socioeconomic and behavioural variables in the study population, NCD study 2016

| Variable              | Model I |             | Model II |             | Model III |             |
|-----------------------|---------|-------------|----------|-------------|-----------|-------------|
|                       | Exp     | C.I.        | Exp B    | C.I.        | Exp B     | C.I.        |
| <b>Sex</b>            |         |             |          |             |           |             |
| Male                  | 1.00    |             | 1.00     |             | 1.00      |             |
| Female                | 2.75**  | (2.08-3.64) | 3.01**   | (2.12-4.26) | 2.74**    | (1.92-3.90) |
| <b>Age</b>            |         |             |          |             |           |             |
| ≤24                   | 1.00    |             | 1.00     |             | 1.00      |             |
| 25-34                 | 2.08**  | (1.42-3.03) | 1.77**   | (1.12-2.77) | 1.83**    | (1.17-2.88) |
| 35-44                 | 4.02**  | (2.67-6.08) | 3.70**   | (2.23-6.12) | 3.87**    | (2.34-6.42) |
| 45-54                 | 4.28**  | (2.70-6.78) | 3.04**   | (1.66-5.55) | 3.26**    | (1.78-5.98) |
| 55-64                 | 5.78**  | (3.26-10.2) | 4.91**   | (2.35-10.2) | 5.53**    | (2.62-11.6) |
| 65+                   | 2.78**  | (1.46-5.28) | 2.74**   | (1.15-6.50) | 2.88**    | (1.21-6.86) |
| <b>Marital status</b> |         |             |          |             |           |             |
| Never-married         | 0.46**  | (0.30-0.71) | 0.68     | (0.34-1.34) | 0.66      | (0.33-1.32) |
| Currently-married     | 1.39    | (0.84-2.29) | 1.34     | (0.66-2.71) | 1.28      | (0.63-2.61) |
| Formerly-married      | 1.00    |             | 1.00     |             | 1.00      |             |
| <b>Education</b>      |         |             |          |             |           |             |
| Primary or less       | 1.00    |             | 1.00     |             | 1.00      |             |
| Secondary             | 0.69**  | (0.53-0.91) | 0.49**   | (0.29-0.83) | 1.70**    | (1.11-2.61) |
| Tertiary or higher    | 0.96    | (0.69-1.35) | 0.87     | (0.58-1.32) | 1.99**    | (1.16-3.38) |
| <b>Residence</b>      |         |             |          |             |           |             |
| Cities and towns      | 1.00    |             | 1.00     |             | 1.00      |             |
| Urban villages        | 1.13    | (0.86-1.50) | 1.06     | (0.74-1.50) | 1.07      | (0.75-1.52) |
| Rural villages        | 1.44**  | (1.04-1.99) | 1.37     | (0.88-2.12) | 1.37      | (0.88-2.12) |
| <b>Work status</b>    |         |             |          |             |           |             |
| Public sector         | 1.61    | (0.89-2.93) | 1.30     | (0.64-2.65) | 1.22      | (0.59-2.50) |
| Private sector        | 0.86    | (0.49-1.51) | 1.20     | (0.61-2.36) | 1.19      | (0.60-2.35) |
| self-employed         | 1.18    | (0.65-2.13) | 1.24     | (0.61-2.51) | 1.29      | (0.63-2.62) |
| Not employed          | 1.25    | (0.75-2.08) | 1.30     | (0.70-2.40) | 1.30      | (0.70-2.41) |
| Home-maker/student    | 0.61    | (0.35-1.07) | 0.96     | (0.48-1.92) | 0.96      | (0.48-1.92) |
| Retired/other         | 1.00    |             | 1.00     |             | 1.00      |             |
| <b>Wealth status</b>  |         |             |          |             |           |             |
| Lowest                | 0.80    | (0.55-1.17) | 0.60     | (0.34-1.05) | 1.03      | (0.64-1.68) |
| second                | 0.96    | (0.66-1.40) | 0.67     | (0.40-1.11) | 1.12      | (0.68-1.85) |
| middle                | 0.88    | (0.60-1.28) | 0.73     | (0.45-1.19) | 1.20      | (0.71-2.01) |
| Fourth                | 0.83    | (0.57-1.21) | 0.79     | (0.50-1.23) | 1.53      | (0.87-2.69) |
| Highest               | 1.00    |             | 1.00     |             | 1.00      |             |

|                                         |                   |     |                    |
|-----------------------------------------|-------------------|-----|--------------------|
| <b>Smoking</b>                          |                   | N.I |                    |
| Yes                                     | 0.56* (0.37-0.83) |     | 2.16** (1.22-3.83) |
| No                                      | 1.00              |     | 1.00               |
| <b>Poor physical activity</b>           |                   | N.I |                    |
| Yes                                     | 1.08 (0.83-1.40)  |     | 1.46** (1.03-3.24) |
| No                                      | 1.00              |     | 1.00               |
| <b>Poor fruit/vegetable consumption</b> |                   | N.I |                    |
| Yes                                     | 0.82 (0.55-1.22)  |     | 0.80 (0.28-2.24)   |
| no                                      | 1.00              |     | 1.00               |
| <b>Alcohol consumption</b>              |                   | N.I |                    |
| Yes                                     | 0.66* (0.47-0.91) |     | 1.23 (0.53-2.83)   |
| No                                      | 1.00              |     | 1.00               |

N.I- not included

Model I: Crude model; Model II: socioeconomic variables included; Model III: socioeconomic + behavioural characteristics included. \*\*statistically significant at  $p \leq 0.05$ .

## Discussion

Estimated prevalence of overweight/obesity in the study population was 41.3%. This high prevalence is similar to the growing prevalence of overweight/obesity sweeping across Southern Africa, with national prevalence rates ranging between 30 and 60% among populations over the age of 15 years in most countries<sup>10,26-31</sup>. The high prevalence of overweight/obesity observed in Botswana may be attributed to: dietary shift away from high-fibre, low-calorie diets rich in fruits and vegetables towards refined, energy-dense foods high in fat, calories, sweeteners and salt<sup>27</sup> and to low physical activity due to transition from agrarian to a sedentary industrial society<sup>32</sup>.

The existence of socioeconomic differences in overweight/obesity prevalence is a well-established finding, and has been previously confirmed<sup>33-34</sup>. This study adds to those findings. In particular, this analysis suggests that more women than men were overweight/obese. For example, women were found to be two times more likely to be overweight/obese than men. Literature yields mounting evidence on the gender differential for overweight/obesity across and within countries<sup>35-37</sup>. While in some developed countries such as the US and the UK men have been observed to be more overweight than women<sup>38</sup>, in developing countries women are noted to be overweight than men<sup>35,39</sup>. However, although gender differences for overweight and obesity vary greatly within and between countries, overall women are likely to be overweight and obese than men. Similarly in this data it was noted that gender disparities in overweight and obesity were exacerbated among women, like elsewhere in developing countries, especially in the Middle East and SSA<sup>35</sup>.

Gender differences in overweight/obesity observed between developed and developing countries with weight gain high among men in developed countries and

1  
2  
3 high among women in developing countries indicate that gender disparities in excess  
4 weight gain are explained by myriad sociocultural dynamics. For instance,  
5 acculturation, through complex sociocultural pathways, affects weight gain among  
6 both men and women. Moreover, the nutrition transition taking place in many  
7 developing countries has also affected excess weight gain among both genders, but  
8 has had an even greater impact on the physical activity levels of women<sup>40</sup>.  
9  
10 Furthermore, in some countries, cultural values favour larger body size among  
11 women or men as a sign of fertility, healthfulness, or prosperity especially in SSA<sup>41</sup>.  
12 Other studies suggest that contextual factors drive gender differences in food  
13 consumption, and women often report consuming healthier foods, yet may consume  
14 more sugar-laden foods, than men<sup>42</sup>.

15  
16 Similarly, in Botswana gender differences in overweight/obesity can be explained by  
17 a wide array of sociocultural dynamics. Firstly, although women are more likely to  
18 report eating or wanting to eat “healthier” foods, they seem to prefer and consume  
19 more foods high in added sugars than men including energy-dense processed foods  
20 such as cookies, chocolate, and ice cream. Secondly, overweight among women  
21 may also be attributed to comparatively low levels of physical activity<sup>43</sup>. Moreover,  
22 like in other African settings, being overweight/obese among Botswana women is  
23 considered as a sign of social status, fertility, good health and prosperity<sup>39</sup>.

24  
25 The odds of being overweight/obese increased with age after controlling for  
26 socioeconomic and behavioural factors. This is quite indicative that age is a  
27 significant correlate of overweight/obesity independent of other covariates. It was  
28 found that odds of being overweight and obese increased with age and were highest  
29 among individuals aged 55-64 years but declined at ages 65+ years. This finding  
30 corroborates data from large population studies<sup>44-46</sup> which shows that mean body



1  
2  
3 weight and BMI gradually increases during most of adult life and reach peak values  
4  
5 at 50–59 years of age in both men and women and after the age of 60 years, mean  
6  
7 body weight and BMI tend to decrease.  
8  
9

10 Clinically it has been found that aging is associated with considerable body changes  
11  
12 in body composition<sup>47</sup>. It has been suggested that after 20–30 years of age, fat-free  
13  
14 mass (FFM) progressively decreases, whereas fat mass increases<sup>48</sup>. Aging is also  
15  
16 associated with a redistribution of both body fat and FFM whereby there is a greater  
17  
18 relative increase in intra-abdominal fat than in subcutaneous or total body fat, and  
19  
20 there is a greater relative decrease in peripheral than in central FFM because of the  
21  
22 loss of skeletal muscle<sup>49</sup>. This possibly explains the observed pattern noted in this  
23  
24 data of having high odds of overweight/obesity among the elderly than the young  
25  
26 population.  
27  
28  
29

30  
31 Education differences were also observed for overweight/obesity. It was found that  
32  
33 individuals who had secondary and tertiary education were more likely to be  
34  
35 overweight/obese than individuals with primary or less education. This finding  
36  
37 corroborates other studies which have shown that education may be associated with  
38  
39 overweight/obesity via socioeconomic status, literacy and health behaviors<sup>50</sup>.  
40  
41 Furthermore, studies which have used education as a proxy for socioeconomic  
42  
43 status in developing countries have shown that individuals with high educational  
44  
45 attainment were more likely to be obese<sup>51</sup>. The relationship between educational  
46  
47 attainment and obesity also depends on the individual's level of development, such  
48  
49 that positive associations are more common in more educated groups<sup>52</sup>.  
50  
51  
52  
53

54  
55 There was no significant relationship observed between overweight/obesity and work  
56  
57 status and wealth status in the general study population. The observed pattern of no  
58  
59 association between overweight/obesity and work and wealth status may suggest  
60

1  
2  
3 that in Botswana, there is no diet differences based on the wealth and work status of  
4 individuals. Moreover, Botswana has over the decades moved from lower human  
5 development index (HDI) to middle HDI, consequently leading to nutrition transition  
6 where both the poor and non-poor have access to diets with more fat, more meat,  
7 added sugars and bigger portion sizes, and lower physical activity.  
8  
9

10  
11  
12 Adjustment for known risk factors suggested that variations in smoking accounted for  
13 part of the socioeconomic variation in overweight/obesity. It was noted the odds of  
14 overweight/obesity increased two times among smokers than non-smokers. Chiolero  
15 *et al.*<sup>41</sup> based on literature review observed that heavy smokers tend to have greater  
16 body weight than do light smokers or non-smokers, which likely reflect a clustering of  
17 other risky behaviours (e.g. low level of physical activity, poor diet, and smoking) that  
18 is conducive to weight gain<sup>23-24</sup>. In this dataset it was observed that smoking, among  
19 men clustered with poor diet and alcohol consumption.  
20  
21  
22

23  
24  
25 Overweight/obesity was significantly associated with poor physical activity. A decline  
26 in physical activity leads to adiposity. This has been established in literature<sup>53-54</sup>. It  
27 has been shown that although there is genetic predisposition to overweight/obesity,  
28 overweight/obesity can also result from an energy imbalance between calories  
29 consumed and calories expended<sup>55</sup>. This may be due to lack of physical activity  
30 ultimately leading to decreases in energy expenditure (perhaps creating a chronic  
31 energy imbalance), than to increases in energy intake, strongly implicating physical  
32 inactivity in the aetiology of overweight/obesity. The relationship between overweight  
33 and obesity and poor physical activity can be bidirectional, whereby poor physical  
34 activity leads to overweight/obesity and also overweight/obesity may lead to further  
35 poor physical activity hence predisposing individuals to chronic diseases such as  
36 hypertension and diabetes<sup>29</sup>.  
37  
38  
39  
40  
41  
42  
43  
44  
45  
46  
47  
48  
49  
50  
51  
52  
53  
54  
55  
56  
57  
58  
59  
60

## Conclusion

Findings from this study indicate high levels of overweight/obesity in Botswana. Key socioeconomic factors associated with overweight/obesity are being a woman, increasing age, and high education (secondary and tertiary level education). Behavioral factors found to be positively associated with overweight/obesity were smoking and poor physical activity. These results demonstrate that socioeconomic and behavioural factors play an important role in prevalence of overweight/obesity in Botswana. Consequently any programs and interventions for reduction and management of overweight/obesity should focus on women, adults, individuals with high education, smokers and physically inactive people.

## Acknowledgments

We wish to thank University of Botswana for affording us the time and resources to undertake this study. We also wish to thank the Office of Research of Development (ORD) at University of Botswana for providing funding for the survey on 'Chronic Non communicable Diseases in Botswana: Chronic disease prevalence, Health Care Utilization, Health Expenditure and the Life course' (NCD study) from which data for this article was derived.

## Contributors

MK conceived and undertook the study as part of his PhD research. KN was the lead investigator, while MK, GL, KB, SDR, LG, TM and RM were co-investigators and takes responsibility for the integrity of the data. KN, KB, and MK oversaw the NCD study design and data analysis. MK wrote the first draft of the article. All authors reviewed and approved the final draft of the article.

## Funding

The 'Chronic Non communicable Diseases in Botswana: Chronic disease prevalence, Health Care Utilization, Health Expenditure and the Life course' survey was supported by Office of Research and Development, Round 28 Funding.

## Disclaimer

The funding body had no role in the design of the study, analyses, interpretation or decision to submit the manuscript for publication.

## Competing Interests

None declared

## Participant consent

Obtained

## Ethics Approval

All ethical clearance formalities were completed before the start of the study. The study proposal along with the necessary documents was submitted to Institutional Review Board of the University of Botswana and Ministry of Health and Wellness for ethical clearance.

## Data sharing statement

The dataset used and/or analysed during the current study is available from the corresponding author (Mpho Keetile) on reasonable request from the Office of Research and Development, University of Botswana.

## References

1. World Health Organization, The global status of overweight and obesity. Fact Sheet. (2016), Geneva.
2. Musaiger AO, Al-Hazzaa HM. Prevalence and risk factors associated with nutrition-related noncommunicable diseases in the Eastern Mediterranean region. *Int J Gen Med*. 2012;5:199-217.
3. Baldwin W, Kaneda T, Amato L, et al. Noncommunicable diseases and youth: a critical window of opportunity for Latin America and the Caribbean. Washington, DC: Population Reference Bureau; 2013. Used with permission.
4. Bhurosy T, Jeewon R. Overweight and obesity epidemic in developing countries: a problem with diet, physical activity, or socioeconomic status?. *ScientificWorldJournal*. 2014;2014:964236.
5. Ford N.D., Patel S.A, Narayan K.M.V, Obesity in Low- and Middle-Income Countries: Burden, Drivers, and Emerging Challenges. *Annu. Rev. Public Health* 2017. 38:145–64
6. Amugsi DA, Dimbuene ZT, Mberu B, et al. Prevalence and time trends in overweight and obesity among urban women: an analysis of demographic and health surveys data from 24 African countries, 1991–2014. *BMJ*;7:e017344. doi:10.1136/bmjopen-2017-017344.
7. Hruby A, Hu FB. The Epidemiology of Obesity: A Big Picture. *Pharmacoeconomics*. 2015;33(7):673-89.
8. Mamun A.A , Finlay J.E, Shifting of under-nutrition to over-nutrition and its determinants among women of reproductive ages in the 36 low to medium income countries. *Obes Res Clin Pract*. 2015; 9: 75-86.

- 1  
2  
3 9. Micklesfield LK, Lambert EV, Hume DJ, et al. Socio-cultural, environmental  
4 and behavioural determinants of obesity in black South African women.  
5  
6 *Cardiovasc J Afr.* 2013;24(9-10):369-75.  
7  
8
- 9  
10 10. Biadgilign S, Mgutshini T, Haile D, Gebremichael B, Moges Y, Tilahun K.  
11  
12 Epidemiology of obesity and overweight in sub-Saharan Africa: a protocol for a  
13  
14 systematic review and meta-analysis. *BMJ Open.* 2017;7(11):e017666.  
15  
16 Published 2017 Nov 25. doi:10.1136/bmjopen-2017-017666.  
17  
18
- 19  
20 11. Ball GD, Mushquash AR, Keaschuk RA, et al. Using intervention mapping to  
21  
22 develop the Parents as Agents of Change (PAC) intervention for managing  
23  
24 pediatric obesity. *BMC Res Notes* 2017;10:43.  
25  
26
- 27  
28 12. Kelly AS, Barlow SE, Rao G, et al. Severe obesity in children and adolescents:  
29  
30 identification, associated health risks, and treatment approaches: a scientific  
31  
32 statement from the American Heart Association. *Circulation* 2013;128:1689–  
33  
34 712.  
35  
36
- 37  
38 13. Kelly AS, Barlow SE, Rao G, et al. Severe obesity in children and adolescents:  
39  
40 identification, associated health risks, and treatment approaches: a scientific  
41  
42 statement from the American Heart Association. *Circulation* 2013;128:1689–  
43  
44 712  
45  
46
- 47  
48 14. World Health Organization (WHO). Obesity and overweight. Geneva: World  
49  
50 Health Organization, 2016.  
51
- 52  
53 15. Levine J.A., Poverty and obesity in the U.S. *Diabetes* 2011;60:2667-2668.  
54
- 55  
56 16. Kim J, Sharma SV, Park SK. Association between socioeconomic status and  
57  
58 obesity in adults: evidence from the 2001 to 2009 Korea national health and  
59  
60 nutrition examination survey. *J Prev Med Public Health.* 2014;47(2):94-103.

- 1  
2  
3 17. You J, Choo J. Adolescent Overweight and Obesity: Links to Socioeconomic  
4 Status and Fruit and Vegetable Intakes. *Int J Environ Res Public Health*.  
5 2016;13(3):307. Published 2016 Mar 9. doi:10.3390/ijerph13030307.  
6  
7  
8  
9  
10 18. Maffetone PB, Laursen PB. The Prevalence of Overfat Adults and Children in  
11 the US. *Front Public Health*. 2017;5:290. Published 2017 Nov 1.  
12 doi:10.3389/fpubh.2017.00290.  
13  
14  
15  
16  
17 19. Lumsden MA, Hor K. Impact of obesity on the health of women in midlife. *The*  
18 *Obstetrician & Gynaecologist* 2015; 17:201–8.  
19  
20  
21  
22 20. Kim TJ, von dem Knesebeck O. Income and obesity: what is the direction of  
23 the relationship? A systematic review and meta-analysis. *BMJ Open*.  
24 2018;8(1):e019862. Published 2018 Jan 5. doi:10.1136/bmjopen-2017-019862  
25  
26  
27  
28  
29 21. Hong I, Coker-Bolt P, Anderson KR, Lee D, Velozo CA. Relationship Between  
30 Physical Activity and Overweight and Obesity in Children: Findings From the  
31 2012 National Health and Nutrition Examination Survey National Youth Fitness  
32 Survey. *Am J Occup Ther*. 2016;70(5):7005180060p1-8.  
33  
34  
35  
36  
37  
38  
39 22. Popkin, B. M., & Slining, M. M. New dynamics in global obesity facing low- and  
40 middle-income countries. *Obesity Reviews: An Official Journal of the*  
41 *International Association for the Study of Obesity*, 2013; 14(0 2), 11–20.  
42 <http://doi.org/10.1111/obr.12102>.  
43  
44  
45  
46  
47  
48 23. Dare, S., Mackay, D. F., & Pell, J. P. Relationship between Smoking and  
49 Obesity: A Cross-Sectional Study of 499,504 Middle-Aged Adults in the UK  
50 General Population. *PLoS ONE*, 2015; 10(4).  
51  
52  
53  
54  
55  
56 24. Tuovinen, E.-L., Saarni, S. E., Männistö, S., Borodulin, K., Patja, K., Kinnunen,  
57 T. H. ... Korhonen, T. Smoking status and abdominal obesity among normal-  
58  
59  
60



- 1  
2  
3 and overweight/obese adults: Population-based FINRISK study. Preventive  
4  
5 Medicine Reports, 2016;4, 324–330.  
6  
7
- 8 25. Keetile M., Letamo G., & Navaneetham K. Patterns and determinants of  
9  
10 hypertension in Botswana, J Public Health. 2015;, 23:311–318.  
11  
12
- 13 26. Peltzer, K., and Phaswana-Mafuya, N. Fruit and vegetable intake and  
14  
15 associated factors in older adults in South Africa. Global Health Action, 2012;  
16  
17 5, 10.3402/  
18  
19
- 20 27. Nnyepi MS, Gwisai N, Lekgoa M, Seru T. Evidence of nutrition transition in  
21  
22 Southern Africa. Proc Nutr .2015; Soc. 17:1–9.  
23  
24
- 25 28. Kelly AS, Barlow SE, Rao G, et al. Severe obesity in children and adolescents:  
26  
27 identification, associated health risks, and treatment approaches: a scientific  
28  
29 statement from the American Heart Association. Circulation 2013;128:1689–  
30  
31 712  
32  
33
- 34 29. World Health Organization (WHO). Obesity and overweight. Geneva: World  
35  
36 Health Organization, 2016.  
37  
38
- 39 30. GBD 2015 Risk Factors Collaborators. Global, regional, and national  
40  
41 comparative risk assessment of 79 behavioural, environmental and  
42  
43 occupational, and metabolic risks or clusters of risks, 1990-2015: a systematic  
44  
45 analysis for the Global Burden of Disease Study 2015. Lancet 2016;388:1659–  
46  
47 724.  
48  
49
- 50 31. Agymang C, Boatemaa S, Frempong Agymang G, de Graft Aikins, Obesity in  
51  
52 Sub Saharan Africa. Metabolic Syndrome. Springer International Publishing,  
53  
54 Switzerland. Ed. Rexford Ahima. 2015  
55  
56  
57  
58  
59  
60

- 1  
2  
3 32. Amoah A.G. Sociodemographic variations in obesity among Ghanaian  
4 adults. *Public Health Nutr.* 2003;6:751-757  
5  
6  
7  
8 33. Biadgilign, S., Mgutshini, T., Haile, D., Gebremichael, B., Moges, Y., & Tilahun,  
9 K. Epidemiology of obesity and overweight in sub-Saharan Africa: a protocol  
10 for a systematic review and meta-analysis. *BMJ Open*, 2017;7(11).  
11  
12  
13  
14  
15 34. Cohen, A. K., Rai, M., Rehkopf, D. H., & Abrams, B. Educational attainment  
16 and obesity: A systematic review. *Obesity Reviews: An Official Journal of the*  
17 *International Association for the Study of Obesity*, 2013; 14(12), 989–1005.  
18 <http://doi.org/10.1111/obr.12062>.  
19  
20  
21  
22  
23  
24  
25 35. Kanter R & Caballero B. Global Gender Disparities in Obesity: A Review  
26 *American Society for Nutrition. Adv. Nutr.* 2012;3: 491–498, 2012;  
27 [doi:10.3945/an.112.002063](https://doi.org/10.3945/an.112.002063).  
28  
29  
30  
31  
32 36. Li L, Gower BA, Shelton RC, Wu X. Gender-Specific Relationship between  
33 Obesity and Major Depression. *Front Endocrinol (Lausanne)*. 2017;8:292.  
34  
35  
36  
37 37. Pinto KA, Griep RH, Rotenberg L, Almeida MdCC, Barreto RS, et al.  
38 Correction: Gender, time use and overweight and obesity in adults: Results of  
39 the Brazilian Longitudinal Study of Adult Health (ELSA-Brasil). *PLOS ONE*  
40 2018;13(8): e0198380.  
41  
42  
43  
44  
45  
46  
47 38. Luppino FS, de Wit LM, Bouvy PF, Stijnen T, Cuijpers P, Penninx BW, et al.,  
48 Overweight, obesity, and depression: a systematic review and meta-analysis  
49 of longitudinal studies. *Arch Gen Psychiatry.* 2010; 67:220–9.  
50  
51  
52  
53  
54 39. Letamo G. The prevalence of, and factors associated with, overweight and  
55 obesity in Botswana. *J Biosoc Sci.* 2011; 43(1):75-84.  
56  
57  
58  
59  
60

- 1  
2  
3 40. Brochu P, Bouchard M, Haddad S. Physiological daily inhalation rates for  
4 health risk assessment in overweight/obese children, adults, and elderly. *Risk*  
5 *Anal.* 2013. doi: 10.1111/risa.12125.  
6  
7  
8  
9  
10 41. Chielero A, Faeh D, Paccaud F, Cornuz J. "Consequences of smoking for  
11 body weight, body fat distribution, and insulin resistance." *American Journal of*  
12 *Clinical Nutrition* 2008; 87: 801-809.  
13  
14  
15  
16  
17 42. Coulson T, Bruce E. Kendall, Julia Barthold, Floriane Plard, Susanne  
18 Schindler, Arpat Ozgul, and Jean-Michel Gaillard, "Modelling Adaptive and  
19 Nonadaptive Responses of Populations to Environmental Change," *The*  
20 *American Naturalist* ,2017;190(3). 313-336.  
21  
22  
23  
24  
25  
26  
27 43. Malete L, Mokgathe L, Nnyepi M, et al. Effects of a High Protein Food  
28 Supplement on Physical Activity, Motor Performance and Health Related  
29 Quality of Life of HIV Infected Botswana Children on Anti-Retroviral Therapy  
30 (ART). *AIMS Public Health.* 2017;4(3):258-277.  
31  
32  
33  
34  
35  
36  
37 44. Flegal KM, Carroll MD, Kuczmarski RJ, Johnson CL. Overweight and obesity in  
38 the United States: prevalence and trends, 1960–1994. *Int J*  
39 *ObesRelatMetabDisord*; 1998; 22:39–47.  
40  
41  
42  
43  
44 45. Villareal D.T., Apovian C.M., Kushner R.F., Klein S., Obesity in older adults:  
45 technical review and position statement of the American Society for Nutrition  
46 and NAASO, The Obesity Society, *The American Journal of Clinical Nutrition*,  
47 2005 82 (5), 923–934  
48  
49  
50  
51  
52  
53  
54 46. Sperrin M, Marshall AD, Higgins V, Renehan AG, Buchan IE. Body mass index  
55 relates weight to height differently in women and older adults: serial cross-  
56  
57  
58  
59  
60

- 1  
2  
3 sectional surveys in England (1992-2011). *J Public Health (Oxf)*.  
4  
5 2016;38(3):607-613.  
6  
7
- 8 47. Gabriela Vazquez, Sue Duval, David R. Jacobs, Karri Silventoinen;  
9  
10 Comparison of Body Mass Index, Waist Circumference, and Waist/Hip Ratio in  
11  
12 Predicting Incident Diabetes: A Meta-Analysis, *Epidemiologic Reviews*, 2007  
13  
14 29,(1).115–128.  
15  
16
- 17 48. Emerging Risk Factors Collaboration, Wormser D, Kaptoge S, et al. Separate  
18  
19 and combined associations of body-mass index and abdominal adiposity with  
20  
21 cardiovascular disease: collaborative analysis of 58 prospective studies.  
22  
23 *Lancet*. 2011;377(9771):1085-95.  
24  
25
- 26 49. Morio, B., Barra, V., Ritz, P. et al. Benefit of endurance training in elderly  
27  
28 people over a short period is reversible. *Eur J Appl Physiol* (2000) 81: 329.  
29  
30
- 31 50. Fletcher J, Frisvold D. Higher education and health investments: Does more  
32  
33 schooling affect preventive health care use. *Journal Capital*. 2009; 3(2):144–  
34  
35 176.  
36  
37
- 38 51. Cohen AK, Rai M, Rehkopf DH, Abrams B. Educational attainment and  
39  
40 obesity: a systematic review. *Obes Rev*. 2013;14(12):989-1005.  
41  
42
- 43 52. Devaux, Marion, et al. (2011), “Exploring the Relationship Between Education  
44  
45 and Obesity”, *OECD Journal: Economic Studies* , Vol. 2011/1.  
46  
47
- 48 53. Traversy G. & Chaput Jean-Philippe (2015), Alcohol Consumption and  
49  
50 Obesity: An Update, *Curr Obes Rep* (2015) 4:122–130.  
51  
52
- 53 54. Fiscella, K., & Kitzman, H. Disparities in Academic Achievement and Health:  
54  
55 The Intersection of Child Education and Health Policy. *Pediatrics*, 2009; 123,  
56  
57 1073-1080.  
58  
59  
60

1  
2  
3 55. Ford ND, Patel SA, & Narayan KM. Obesity in Low- and Middle-Income  
4 Countries: Burden, Drivers, and Emerging Challenges. *Annu Rev Public*  
5 *Health*. 2017;20;38:145-164.  
6  
7  
8  
9

10 56. Weichenthal, S., Hoppin, J. A., & Reeves, F. Obesity and the cardiovascular  
11 health effects of fine particulate air pollution. *Obesity (Silver Spring, Md.)*,  
12 2014. 22(7), 1580–1589. <http://doi.org/10.1002/oby.20748>  
13  
14  
15  
16  
17  
18  
19  
20  
21  
22  
23  
24  
25  
26  
27  
28  
29  
30  
31  
32  
33  
34  
35  
36  
37  
38  
39  
40  
41  
42  
43  
44  
45  
46  
47  
48  
49  
50  
51  
52  
53  
54  
55  
56  
57  
58  
59  
60

For peer review only

# BMJ Open

## Socioeconomic and behavioural determinants of overweight/obesity among adults in Botswana: A cross-sectional study

|                                 |                                                                                                                                                                                                                                                                                                                                                                                                                                                                                          |
|---------------------------------|------------------------------------------------------------------------------------------------------------------------------------------------------------------------------------------------------------------------------------------------------------------------------------------------------------------------------------------------------------------------------------------------------------------------------------------------------------------------------------------|
| Journal:                        | <i>BMJ Open</i>                                                                                                                                                                                                                                                                                                                                                                                                                                                                          |
| Manuscript ID                   | bmjopen-2019-029570.R1                                                                                                                                                                                                                                                                                                                                                                                                                                                                   |
| Article Type:                   | Original research                                                                                                                                                                                                                                                                                                                                                                                                                                                                        |
| Date Submitted by the Author:   | 10-Jun-2019                                                                                                                                                                                                                                                                                                                                                                                                                                                                              |
| Complete List of Authors:       | Keetile, Mpho; University of Botswana, Population Studies Navaneetham, Kannan; University of Botswana, Population Studies Letamo, Gobopamang; University of Botswana, Population Studies Bainame, Kenabetsho; University of Botswana, Population Studies Rakgoasi, Serai; University of Botswana, Population Studies Gabaitiri, Lesego; University of Botswana, Statistics Masupe, Tiny; University of Botswana, School of Medicine Molebatsi, Robert; University of Botswana, Sociology |
| <b>Primary Subject Heading</b>: | Public health                                                                                                                                                                                                                                                                                                                                                                                                                                                                            |
| Secondary Subject Heading:      | Epidemiology, Global health                                                                                                                                                                                                                                                                                                                                                                                                                                                              |
| Keywords:                       | Overweight, Obesity, Socioeconomic, Behavioural, Botswana                                                                                                                                                                                                                                                                                                                                                                                                                                |
|                                 |                                                                                                                                                                                                                                                                                                                                                                                                                                                                                          |

SCHOLARONE™  
Manuscripts

1  
2  
3  
4  
5 **Socioeconomic and behavioural determinants of overweight/obesity**  
6 **among adults in Botswana: A cross-sectional study**  
7  
8

9 Mpho Keetile<sup>1</sup>, Kannan Navaneetham<sup>1</sup>, Gobopamang Letamo<sup>1</sup>, Kenabetsho  
10 Bainame<sup>1</sup>, Serai Daniel Rakgoasi<sup>1</sup>, Lesego Gabaitiri<sup>2</sup>, Tiny Masupe<sup>3</sup>, Robert  
11 Molebatsi<sup>4</sup>.  
12  
13

14  
15 **Author Affiliations**  
16

17 <sup>1</sup>Department of Population Studies, University of Botswana, Gaborone, Botswana

18 <sup>2</sup>Department of Statistics, University of Botswana, Gaborone, Botswana

19 <sup>3</sup>School of Medicine, University of Botswana, Gaborone, Botswana

20 <sup>4</sup>Department of Sociology, University of Botswana, Gaborone  
21  
22  
23  
24

25 **Corresponding author**  
26

27 Mpho Keetile, Department of Population Studies, Private Bag 00705, University of  
28 Botswana, Gaborone, Botswana. email: mphokeet@yahoo.com. Tel: +26771231375  
29  
30  
31  
32  
33  
34  
35  
36  
37  
38  
39  
40  
41  
42  
43  
44  
45  
46  
47  
48  
49  
50  
51  
52  
53  
54  
55  
56  
57  
58  
59  
60

**Word count: 3923**

## Abstract

### Objective

To undertake a comprehensive assessment of socioeconomic and behavioural determinants of overweight/obesity among adult population in Botswana.

### Design

The study adopted a cross-sectional design by selecting adult respondents in three cities and towns, fifteen urban villages and fifteen rural areas across Botswana using a multistage probability sampling technique.

### Setting

The study was conducted in selected rural and urban areas of Botswana.

### Participants

The study sample consisted of 1178 adult males and females aged 15 years and above.

### Primary Outcome Measures

Objectively measured overweight/obesity.

### Results

Prevalence of overweight/obesity in the study population was estimated at 41%. The adjusted odds ratio (AOR) of overweight/obesity were highest among women (AOR=2.74, 95% C.I. =1.92-3.90), in ages 55-64 years (AOR=5.53, 95% C.I. = 2.62-11.6), among individuals with secondary (AOR=1.70, 95% C.I. = 1.11-2.61) and tertiary education (AOR=1.99, 95% C.I. =1.16-3.38), smokers (AOR=2.16, 95% C.I. = 1.22-3.83) and people with poor physically activity (AOR=1.46, 95% C.I. =1.03-3.24). These were statistically significant at 5% level.



## Conclusion

Being female, elderly, of high education levels, a smoker and having poor physical activity were identified as key factors for prevalence of overweight/obesity. These findings suggest the need for broad based strategies encouraging physical activity among different socioeconomic groups.

## Key words

**Overweight, Obesity, socioeconomic, behavioural, Botswana**

## Strengths and Limitations of the study

- To our knowledge this is the first cross-sectional study in Botswana to comprehensively assess both the socioeconomic and behavioural determinants of overweight/obesity among adults.
- Data were collected from a large and randomly selected representative population. The data contained information on potential confounding factors, with a low proportion of missing information making the study more comparable.
- As the cross sectional design was employed, the causal relationship between an explanatory and an outcome variable was not established.

## Introduction

The disease profile in Botswana is changing, with most deaths and disability in the foreseeable future likely to be accounted for by the ominous epidemics of non-communicable diseases (NCDs) such as heart disease, stroke, cancer and other chronic diseases. Children, adults and the elderly are all vulnerable to the risk factors that contribute to NCDs especially overweight/obesity, due to unhealthy diets, low physical activity, exposure to tobacco smoke and/or the effects of the harmful use of alcohol<sup>1-3</sup>. The key drivers of NCDs are ageing, rapid unplanned urbanisation, and the globalisation of unhealthy lifestyles. For example, globalization of unhealthy lifestyles like unhealthy diets may show up in individuals as raised blood pressure, increased blood glucose, elevated blood lipids, and overweight/ obesity<sup>1</sup>.

Several studies have recently shown that many low income and middle-income countries (LMICs) are experiencing an increase in the prevalence of overweight/obesity<sup>4-6</sup>. This prevalence is predicted to continue to increase in the future. Much of the increase in prevalence levels for overweight/obesity is expected in countries such as India, some parts of South-East Asia, China, most of South America and some parts of Sub Saharan Africa (SSA)<sup>7-8</sup>. Until recently, SSA was minimally affected by the overweight/obesity epidemic due to under-nutrition and a major burden of Human Immuno Deficiency Virus (HIV) and tuberculosis (TB)<sup>9</sup>. Meanwhile research on overweight/obesity has started to gain significance in SSA<sup>10-14</sup> due to its increasing magnitude.

It has been shown by previous studies that socioeconomic and behavioural factors have a significant association with overweight/obesity<sup>15-16</sup>. These studies have shown that socioeconomic and demographic factors such as sex, age, education level, work

1  
2  
3 status, place of residence and wealth status are significant determinants of  
4  
5 overweight/obesity. It has also been found that women are more likely to be  
6  
7 overweight/obese than men, while the odds of being overweight/obesity has been  
8  
9 seen to increase with age<sup>17-19</sup>. Other studies have shown that being employed in a  
10  
11 high income job, residing in urban areas, having high education and wealth status is  
12  
13 significantly associated with overweight/obesity<sup>20</sup>.  
14  
15  
16  
17  
18

19  
20 There is also available evidence which suggest significant correlation between  
21  
22 behavioural factors and overweight/obesity. For example, there is significant evidence  
23  
24 of a positive association between physical inactivity and the prevalence of  
25  
26 overweight/obesity<sup>21</sup>. It has also been suggested that the relation between physical  
27  
28 activity and health outcomes such as overweight/obesity may be moderated by a  
29  
30 number of lifestyle factors, especially sedentary lifestyle<sup>15, 20, 21</sup>. In many developing  
31  
32 countries, there has been a substantial shift from jobs with high-energy expenditure  
33  
34 such as farming, mining, and forestry, and employment is inclined towards the more-  
35  
36 sedentary sectors of manufacturing, services and office based-work<sup>22</sup>. Moreover,  
37  
38 there have been changes in lifestyle behaviours condoning alcohol consumption, poor  
39  
40 diets and smoking. These are also key risk factors of overweight/obesity<sup>23-24</sup>.  
41  
42  
43  
44  
45  
46

47  
48 The Botswana WHO STEPS surveys conducted in 2007 and 2014 have shown  
49  
50 increasing levels of overweight/obesity in the general adult population of Botswana.  
51  
52 Prevalence of overweight/obesity was 18.7% in 2007<sup>25</sup> and increased to 38.6 % in  
53  
54 2014<sup>26</sup>. Despite evidence of the high prevalence of overweight/obesity in Botswana,  
55  
56 there is little evidence of socioeconomic and behavioural determinants of  
57  
58 overweight/obesity. To the best of our knowledge this is the first cross sectional study  
59  
60

1  
2  
3 which takes into account both socioeconomic and behavioural factors for  
4 understanding the heterogeneity of overweight/obesity in Botswana. The reduction of  
5 overweight/obesity prevalence should be a key goal of health-care policy because of  
6 its association with many NCDs. The main objective of this study was to assess  
7 socioeconomic and behavioural determinants associated with overweight/obesity  
8 prevalence in Botswana.  
9  
10  
11  
12  
13  
14  
15  
16  
17  
18

## 19 **Methods**

### 20 ***Sampling, recruitment and ethics***

21  
22  
23 The study used cross sectional design by selecting respondents in three cities and  
24 towns, fifteen urban villages and fifteen rural areas across Botswana using a  
25 multistage probability sampling technique. A list of districts, localities and enumeration  
26 areas (EAs) together with their households was made based on the 2011 Botswana  
27 Population and Housing census to make sampling frame. At the first stage the  
28 population was stratified into cities and towns, urban villages and rural settlements. A  
29 listing of all 26 census districts in each strata was made and from these districts a total  
30 of all 4845 EAs were listed for rural and urban localities. At the second stage, localities  
31 in urban and rural districts were randomly selected. At the third and fourth stage a  
32 random selection of EAs and households, respectively was made. Lastly, individuals  
33 aged 15 years and over were selected for interview from the list of households with  
34 persons 15 years and over. The NCD study questionnaire was developed using the  
35 instruments from the WHO Study on Global Ageing and Adult Health (SAGE), and  
36 WHO STEPS Surveys.  
37  
38  
39  
40  
41  
42  
43  
44  
45  
46  
47  
48  
49  
50  
51  
52  
53  
54  
55  
56  
57  
58  
59  
60

1  
2  
3 All ethical clearance formalities were completed before the start of the study. The study  
4 proposal along with the necessary documents were submitted to and approved by the  
5 Institutional Review Board of the University of Botswana. Approval for conducting the  
6 study was also obtained from the Government of Botswana through the Ministry of  
7 Health and Wellness. Privacy and confidentiality of highest standard were maintained  
8 by treating all respondents as anonymous and no names of respondents are  
9 mentioned or implied when presenting findings of the study.  
10  
11  
12  
13  
14  
15  
16  
17  
18  
19

### 20 ***Patient and Public involvement***

21  
22  
23 No patients were involved in developing the research question, outcome measures  
24 and overall design of the study. Since this was a cross-sectional study, respondents  
25 were drawn from the general population rather than from healthcare settings, thereby  
26 providing access to all eligible people aged 15 years and above. As part of the study  
27 protocol, all respondents were requested to sign a consent form and were told that  
28 participation in the study was voluntary. For participants aged 15-17 years both  
29 consent and assent were obtained. All individuals aged 15 years and above who had  
30 successfully completed the NCD study questionnaire were included in the analysis for  
31 this study.  
32  
33  
34  
35  
36  
37  
38  
39  
40  
41  
42  
43  
44

### 45 ***Definitions and Measurement of variables***

46  
47  
48 The outcome variable for the study is overweight/obesity. Body Mass Index (BMI) was  
49 used to classify overweight/obesity. BMI was derived from weight and height: weight  
50 (kg) / (height (m) x height (m))<sup>1</sup>. The Charder MS7301 250Kg digital scale and the  
51 Muac measuring tape were used for anthropometric measurements. Weight was  
52 measured, to the nearest 0.1kg, while height was measured in metres. BMI was  
53 categorized into: underweight (BMI < 18.5 kg/m<sup>2</sup>), normal weight (18.5 ≤ BMI <25  
54  
55  
56  
57  
58  
59  
60

1  
2  
3 kg/m<sup>2</sup>), overweight ( $25 \leq \text{BMI} < 30 \text{ kg/m}^2$ ) and obese ( $\text{BMI} \geq 30 \text{ kg/m}^2$ )<sup>1</sup>. Overweight and  
4  
5 obese were used to create a binary outcome variable which was coded as: being  
6  
7 overweight/obese ( $\text{BMI} \geq 25 \text{ kg/m}^2$ ) =1; not overweight/obese =0 ( $\text{BMI} < 25 \text{ kg/m}^2$ ).  
8  
9

10  
11 Information on NCD risk factors was collected through self-reports. Respondents were  
12  
13 asked questions on NCD risk factors such as tobacco use, alcohol consumption,  
14  
15 physical activity and fruit and vegetable consumption. For tobacco use, respondents  
16  
17 were asked whether they currently smoke tobacco products and their response was  
18  
19 coded as yes=1 and no=0. Alcohol consumption was measured based on the intensity  
20  
21 of alcohol consumed in the past 30 days. Respondents who had consumed alcohol in  
22  
23 the past 30 days were asked about the number of standard alcohol drinks they had  
24  
25 each day in the past 7 days and if they reported to have had three or more drinks per  
26  
27 day (of approximately 60g alcohol) it was considered to be excessive drinking=1 and  
28  
29 0=otherwise.  
30  
31  
32

33  
34 Based on WHO recommendations poor physical activity was calculated using an  
35  
36 average typical types of activity undertaken<sup>13</sup>. It was calculated based on the time  
37  
38 taken while doing physical activity in the past 7 days. Respondents were asked  
39  
40 whether they do any moderate to rigorous intensity activities for at least 10 minutes  
41  
42 continuously. This was considered for the domains of work and walking (includes at  
43  
44 work and at home, walking to travel from place to place, and any other walking for  
45  
46 recreation, sport, exercise, or leisure). Based on the time taken on work and walking  
47  
48 the respondents were grouped into four categories of: no activity, low, moderate and  
49  
50 high activity levels to show the intensity of their physical activity. The resultant variable  
51  
52 was coded such that no and low activity (<10 minutes of physical activity) =1 and  
53  
54 moderate and high activity ( $\geq 10$  minutes of physical activity) were coded=0.  
55  
56  
57  
58  
59  
60

Poor fruit and vegetables consumption was created when an individual reported daily consumption of less than the recommended 5 servings of fruit and vegetables. Respondents reported the number of servings for fruits/vegetables they had in a typical day, and if the servings were less than 5 in a day, they were considered to be having poor fruit/vegetable consumption<sup>13, 27, 28</sup>.

A wealth index (WI) was constructed to be a measure of wealth status. WI is a composite measure of indicators of ownership of consumer durables, housing characteristics, and access to public services<sup>16</sup>. Information on a range of durable assets was collected during the survey (e. g. car, refrigerator, television,), housing characteristics (e. g. material of dwelling floor and roof, main cooking fuel), access to basic services (e. g. electricity supply, source of drinking water, sanitation facilities) and ownership of livestock (e.g. cattle, goats, sheep, horses, chickens). Further to collection of information on durable assets, information on ownership of land was also collected. Principal component analysis was employed to derive the wealth index variable, which had five categories from the 1<sup>st</sup> to the 5<sup>th</sup> quintile (poorest to richest).

### **Control variables**

Age and place of residence were used as control variables. These variables were conceptualized to have an association with the outcome variable. Therefore, as control variables they are included in the combined effects model, so that the association between the independent variables of interest becomes isolated and discernible.

### **Statistical analysis**

Data analysis involved descriptive and multivariable analysis. Descriptive analysis provided some basis for further exploration of key determinants of overweight and obesity in Botswana. In the multivariable binary logistic regression, outcome variable

was coded as '1' if respondents were overweight/obese and '0' if they were not overweight/obese. Results of logistic regression analysis were presented together with adjusted odds ratios (AOR), 95% confidence intervals (CI) and 5% statistical significance level. Chi-square test was used for bivariate analysis. Data analysis was done using SPSS version 25 program. Since this was a population based study representative of the population, selection bias was minimal. Moreover the use of systematic random sampling across the population meant that selection bias was minimised further. In order to control for cluster effects complex samples module in SPSS has been used since the NCDs survey used multistage sampling technique.

## Results

### *Sample characteristics*

Table 1 presents results on the sample description for the respondents. The results show that a total of 1,178 respondents between the ages of 15 years and above were successfully interviewed. The sample constituted a high proportion of females (69.1%) than males (30.9%). The sample age distribution suggests a relatively young population, with over half (59%) of the sample being less than 39 years of age, and almost three quarters (73.5%) being less than fifty years of age. As age increases, the sample skewed in favour of females.

Table 1: Socio demographic characteristics

| Variable     | N           | %          |
|--------------|-------------|------------|
| <b>Sex</b>   |             |            |
| Male         | 364         | 30.9       |
| Female       | 813         | 69.1       |
| <b>Total</b> | <b>1177</b> | <b>100</b> |



|                                            |             |            |
|--------------------------------------------|-------------|------------|
| <b>Age in years</b>                        |             |            |
| <24                                        | 270         | 26.4       |
| 25– 34                                     | 302         | 29.5       |
| 35 – 44                                    | 196         | 19.2       |
| 45– 54                                     | 130         | 12.7       |
| 55 – 64                                    | 75          | 7.3        |
| 65+ years                                  | 50          | 4.9        |
| <b>Total</b>                               | <b>1023</b> | <b>100</b> |
| <b>Locality Type</b>                       |             |            |
| Cities/Towns                               | 355         | 30.2       |
| Urban Villages                             | 534         | 45.4       |
| Rural Settlements                          | 288         | 24.5       |
| <b>Total</b>                               | <b>1177</b> | <b>100</b> |
| <b>Marital Status</b>                      |             |            |
| Never Married                              | 864         | 73.8       |
| Currently married                          | 199         | 17.0       |
| Formerly married                           | 108         | 9.2        |
| <b>Total</b>                               | <b>1171</b> | <b>100</b> |
| <b>Highest Level of Education Attained</b> |             |            |
| Primary or Less                            | 410         | 35.5       |
| Junior Secondary                           | 314         | 27.2       |
| Senior Secondary                           | 200         | 17.3       |
| Tertiary & Over                            | 230         | 19.9       |
| <b>Total</b>                               | <b>1154</b> | <b>100</b> |
| <b>Work Status in past 12 months</b>       |             |            |
| Public Sector                              | 122         | 10.5       |
| Private Sector                             | 182         | 15.7       |
| Self Employed                              | 130         | 11.2       |
| Not Employed                               | 436         | 37.5       |
| Homemaker-Student                          | 218         | 18.8       |
| Retired-Other                              | 74          | 6.4        |
| <b>Total</b>                               | <b>1162</b> | <b>100</b> |
| <b>Wealth status</b>                       |             |            |
| Lowest                                     | 234         | 19.9       |
| Second                                     | 237         | 20.1       |
| Middle                                     | 235         | 19.9       |
| Fourth                                     | 237         | 20.1       |
| Highest                                    | 235         | 19.9       |
| <b>Total</b>                               | <b>1178</b> | <b>100</b> |

More than two fifths (45.4%) of the population resided in urban villages; while the remaining proportion resided in cities and towns (30.2%), and rural areas (24.5%).

1  
2  
3 Almost three quarters (73.8%) of respondents were never married; over a third  
4  
5 (35.5%) had primary education or less; over a quarter (27.2%) had junior secondary  
6  
7 education while just under a fifth had senior secondary education (17.3%) and tertiary  
8  
9 education (19.9%). Close to two fifth (37.5%) in the sample were not employed; over  
10  
11 a quarter were employed in either the public or private sector (26.2%) while the  
12  
13 remaining proportion were either self-employed (11.2%) , home makers or students  
14  
15 (18.2%) and retirees (6.4%).  
16  
17  
18  
19  
20  
21  
22  
23  
24  
25  
26  
27  
28  
29  
30  
31  
32  
33  
34  
35  
36  
37  
38  
39  
40  
41  
42  
43  
44  
45  
46  
47  
48  
49  
50  
51  
52  
53  
54  
55  
56  
57  
58  
59  
60

Table 2 below shows behavioural characteristics of the study population. It shows that prevalence of alcohol consumption was estimated at 17.3% while tobacco smoking was estimated at 11.5%. Poor physical activity was also high in the study population with 48.9% of respondents indicating poor physical activity. Poor fruit and vegetable intake was estimated at 82.5%.

Table 2: Behavioural characteristics of the study population

| Variable                           | N           | %          |
|------------------------------------|-------------|------------|
| <b>Smoking</b>                     |             |            |
| Yes                                | 136         | 11.5       |
| No                                 | 1042        | 88.5       |
| <b>Total</b>                       | <b>1178</b> | <b>100</b> |
| <b>Alcohol consumption</b>         |             |            |
| Yes                                | 204         | 17.3       |
| No                                 | 974         | 82.7       |
| <b>Total</b>                       | <b>1178</b> | <b>100</b> |
| <b>Poor physical activity</b>      |             |            |
| Yes                                | 576         | 48.9       |
| No                                 | 602         | 51.1       |
| <b>Total</b>                       | <b>1178</b> | <b>100</b> |
| <b>Poor fruit/vegetable intake</b> |             |            |
| Yes                                | 1045        | 82.5       |
| No                                 | 133         | 17.5       |
| <b>Total</b>                       | <b>1178</b> | <b>100</b> |

### ***Prevalence of overweight/obesity***

Estimated prevalence of overweight/obesity in the study population was 41.3% (Table 3). There were significant gender differences in prevalence of overweight/obesity. It was found that women than men (48.6% among women, 25.5% among men) were overweight/obese. It was observed that individuals residing in rural areas (46.8%), public sector employees (55.2%) and those with lower education (45%) showed high prevalence rates for overweight/obesity. Meanwhile it was found that wealth status was not significantly linked with overweight/obesity. Among behavioural factors this

1  
2  
3 study offers evidence that non-smoker (42.9%) showed high prevalence rates of  
4  
5 overweight/obesity. Alcohol consumption, poor physical activity and poor fruits and  
6  
7 vegetable consumption did not show any significant association with  
8  
9  
10 overweight/obesity.  
11  
12  
13  
14  
15  
16  
17  
18  
19  
20  
21  
22  
23  
24  
25  
26  
27  
28  
29  
30  
31  
32  
33  
34  
35  
36  
37  
38  
39  
40  
41  
42  
43  
44  
45  
46  
47  
48  
49  
50  
51  
52  
53  
54  
55  
56  
57  
58  
59  
60

For peer review only

Table 3: Prevalence of overweight/obesity by socioeconomic and behavioural characteristics of the study population

| Variable              | N   | %    | P-value |
|-----------------------|-----|------|---------|
| <b>Sex</b>            |     |      |         |
| Male                  | 364 | 25.5 | 0.000** |
| Female                | 813 | 48.6 |         |
| <b>Age</b>            |     |      | 0.000** |
| ≤24                   | 270 | 21.8 |         |
| 25-34                 | 302 | 36.8 |         |
| 35-44                 | 196 | 53.0 |         |
| 45-54                 | 130 | 54.5 |         |
| 55-64                 | 75  | 61.8 |         |
| 65+                   | 50  | 43.8 |         |
| <b>Marital status</b> |     |      | 0.000** |
| Never-married         | 864 | 35.5 |         |
| Currently-married     | 199 | 62.2 |         |
| Formerly-married      | 108 | 54.1 |         |
| <b>Education</b>      |     |      | 0.019** |
| Primary or less       | 410 | 45.4 |         |
| Secondary             | 514 | 36.7 |         |
| Tertiary or higher    | 230 | 44.6 |         |
| <b>Residence</b>      |     |      | 0.008** |
| Cities and towns      | 355 | 37.9 |         |
| Urban villages        | 534 | 41.0 |         |
| Rural villages        | 288 | 46.8 |         |
| <b>Work status</b>    |     |      | 0.000** |
| Public sector         | 122 | 52.2 |         |
| Private sector        | 182 | 36.8 |         |
| self-employed         | 130 | 55.0 |         |
| Not employed          | 436 | 45.8 |         |
| Home-maker/student    | 218 | 29.4 |         |
| Retired/other         | 74  | 40.3 |         |
| <b>Wealth status</b>  |     |      | 0.765   |
| Lowest                | 234 | 38.8 |         |
| second                | 237 | 43.2 |         |

|                                         |             |             |         |
|-----------------------------------------|-------------|-------------|---------|
| middle                                  | 235         | 41.1        |         |
| Fourth                                  | 237         | 39.7        |         |
| Highest                                 | 235         | 44.1        |         |
| <b>Alcohol consumption</b>              |             |             | 0.445   |
| No                                      | 766         | 33.3        |         |
| yes                                     | 412         | 37.7        |         |
| <b>Smoking</b>                          |             |             | 0.004** |
| Yes                                     | 136         | 29.7        |         |
| No                                      | 1042        | 42.9        |         |
| <b>Poor physical activity</b>           |             |             | 0.547   |
| Yes                                     | 376         | 41.5        |         |
| No                                      | 771         | 39.6        |         |
| <b>Poor fruit/vegetable consumption</b> |             |             | 0.832   |
| No                                      | 133         | 41.9        |         |
| yes                                     | 1045        | 43.0        |         |
| <b>Overall</b>                          | <b>1178</b> | <b>41.3</b> |         |

Note: \*\*Chi-square test statistically significant at  $p < 0.05$ .

### ***Determinants of overweight/obesity***

Table 4 indicates results of the logistic regression model for overweight/obesity with socioeconomic and behavioural factors. One unadjusted and two adjusted models were run. Model I assessed the association between overweight/obesity and each of the socioeconomic variables and behavioural factors, Model II assessed the association between overweight/obesity adjusting for socioeconomic factors, while Model III assess the association between overweight/obesity adjusting for both socioeconomic and behavioural factors. It was observed that gender had a significant association with overweight/obesity when controlling for both socioeconomic and behavioural factors. Women were observed to have more than 2 times (AOR=2.74, 95% C.I. =1.92-3.90) greater odds for overweight/obesity than men.

1  
2  
3 The odds of being overweight/obese increased with age after controlling for  
4 socioeconomic and behavioural factors and were highest among individuals aged 55-  
5  
6  
7  
8 64 years (AOR=5.53, 95% C.I. = 2.62-11.6), but declined at ages 65+ years  
9  
10 (AOR=2.88, 95% C.I. = 1.21-6.86). Education was also found to be a significant factor  
11  
12 associated with overweight/obesity in the study population after controlling for  
13  
14 socioeconomic covariates. Further, individuals who had secondary (AOR=1.70, 95%  
15  
16 C.I. = 1.11-2.61) and tertiary or higher education (AOR=1.99, 95% C.I. = 1.16-3.38)  
17  
18 were found to have higher probability of being overweight/obese than individuals with  
19  
20 primary or less education. Meanwhile, there was no significant relationship observed  
21  
22 between work status, wealth status and overweight/obesity in the general study  
23  
24  
25  
26  
27  
28  
29  
30  
31  
32  
33  
34  
35  
36  
37  
38  
39  
40  
41  
42  
43  
44  
45  
46  
47  
48  
49  
50  
51  
52  
53  
54  
55  
56  
57  
58  
59  
60

The association between smoking and alcohol consumption with overweight/obesity was found to be negative in the crude model. However, controlling for other socioeconomic and demographic factors, the odds of overweight/obesity increased two times (AOR=2.16, 95% C.I. = 1.22-3.83) among smokers than non-smokers. Overweight/obesity was also significantly associated with poor physical activity (AOR=1.46, 95% C.I. = 1.03-3.24) after adjusting for socioeconomic and behavioural factors.

Table 4: Odds ratios (OR) for the association of Overweight/obesity with socioeconomic and behavioural variables factors in the study population, NCD study 2016.

| Variable              | Model I |             | Model II |             | Model III |             |
|-----------------------|---------|-------------|----------|-------------|-----------|-------------|
|                       | OR      | C.I.        | OR       | C.I.        | OR        | C.I.        |
| <b>Sex</b>            |         |             |          |             |           |             |
| Male                  | 1.00    |             | 1.00     |             | 1.00      |             |
| Female                | 2.75**  | (2.08-3.64) | 3.01**   | (2.12-4.26) | 2.74**    | (1.92-3.90) |
| <b>Age</b>            |         |             |          |             |           |             |
| ≤24                   | 1.00    |             | 1.00     |             | 1.00      |             |
| 25-34                 | 2.08**  | (1.42-3.03) | 1.77**   | (1.12-2.77) | 1.83**    | (1.17-2.88) |
| 35-44                 | 4.02**  | (2.67-6.08) | 3.70**   | (2.23-6.12) | 3.87**    | (2.34-6.42) |
| 45-54                 | 4.28**  | (2.70-6.78) | 3.04**   | (1.66-5.55) | 3.26**    | (1.78-5.98) |
| 55-64                 | 5.78**  | (3.26-10.2) | 4.91**   | (2.35-10.2) | 5.53**    | (2.62-11.6) |
| 65+                   | 2.78**  | (1.46-5.28) | 2.74**   | (1.15-6.50) | 2.88**    | (1.21-6.86) |
| <b>Marital status</b> |         |             |          |             |           |             |
| Never-married         | 0.46**  | (0.30-0.71) | 0.68     | (0.34-1.34) | 0.66      | (0.33-1.32) |
| Currently-married     | 1.39    | (0.84-2.29) | 1.34     | (0.66-2.71) | 1.28      | (0.63-2.61) |
| Formerly-married      | 1.00    |             | 1.00     |             | 1.00      |             |
| <b>Education</b>      |         |             |          |             |           |             |
| Primary or less       | 1.00    |             | 1.00     |             | 1.00      |             |
| Secondary             | 0.69**  | (0.53-0.91) | 0.49**   | (0.29-0.83) | 1.70**    | (1.11-2.61) |
| Tertiary or higher    | 0.96    | (0.69-1.35) | 0.87     | (0.58-1.32) | 1.99**    | (1.16-3.38) |
| <b>Residence</b>      |         |             |          |             |           |             |
| Cities and towns      | 1.00    |             | 1.00     |             | 1.00      |             |
| Urban villages        | 1.13    | (0.86-1.50) | 1.06     | (0.74-1.50) | 1.07      | (0.75-1.52) |
| Rural villages        | 1.44**  | (1.04-1.99) | 1.37     | (0.88-2.12) | 1.37      | (0.88-2.12) |
| <b>Work status</b>    |         |             |          |             |           |             |
| Public sector         | 1.61    | (0.89-2.93) | 1.30     | (0.64-2.65) | 1.22      | (0.59-2.50) |
| Private sector        | 0.86    | (0.49-1.51) | 1.20     | (0.61-2.36) | 1.19      | (0.60-2.35) |
| self-employed         | 1.18    | (0.65-2.13) | 1.24     | (0.61-2.51) | 1.29      | (0.63-2.62) |
| Not employed          | 1.25    | (0.75-2.08) | 1.30     | (0.70-2.40) | 1.30      | (0.70-2.41) |
| Home-maker/student    | 0.61    | (0.35-1.07) | 0.96     | (0.48-1.92) | 0.96      | (0.48-1.92) |
| Retired/other         | 1.00    |             | 1.00     |             | 1.00      |             |
| <b>Wealth status</b>  |         |             |          |             |           |             |
| Lowest                | 0.80    | (0.55-1.17) | 0.60     | (0.34-1.05) | 1.03      | (0.64-1.68) |
| second                | 0.96    | (0.66-1.40) | 0.67     | (0.40-1.11) | 1.12      | (0.68-1.85) |
| middle                | 0.88    | (0.60-1.28) | 0.73     | (0.45-1.19) | 1.20      | (0.71-2.01) |



|                                         |                   |                  |                    |
|-----------------------------------------|-------------------|------------------|--------------------|
| Fourth                                  | 0.83 (0.57-1.21)  | 0.79 (0.50-1.23) | 1.53 (0.87-2.69)   |
| Highest                                 | 1.00              | 1.00             | 1.00               |
| <b>Smoking</b>                          |                   | N.I              |                    |
| Yes                                     | 0.56* (0.37-0.83) |                  | 2.16** (1.22-3.83) |
| No                                      | 1.00              |                  | 1.00               |
| <b>Poor physical activity</b>           |                   | N.I              |                    |
| Yes                                     | 1.08 (0.83-1.40)  |                  | 1.46** (1.03-3.24) |
| No                                      | 1.00              |                  | 1.00               |
| <b>Poor fruit/vegetable consumption</b> |                   | N.I              |                    |
| Yes                                     | 0.82 (0.55-1.22)  |                  | 0.80 (0.28-2.24)   |
| no                                      | 1.00              |                  | 1.00               |
| <b>Alcohol consumption</b>              |                   | N.I              |                    |
| Yes                                     | 0.66* (0.47-0.91) |                  | 1.23 (0.53-2.83)   |
| No                                      | 1.00              |                  | 1.00               |

N.I- not included, Model I: Crude model; Model II: socioeconomic variables included; Model III: socioeconomic + behavioural characteristics included. \*\*statistically significant at  $p < 0.05$ .

## Discussion

The prevalence of overweight/obesity in the study population was 41.3%. Botswana is also joined with other Southern African countries where the national prevalence rates range between 30% and 60% among populations over the age of 15 years in most countries<sup>10, 26-31</sup>. Botswana is currently undergoing a nutrition transition from high-fibre, low-calorie diets rich in fruits and vegetables to refined, energy-dense foods high in fat, calories, sweeteners and salt<sup>12</sup> and to low physical activity due to transition from agrarian to a sedentary industrial society<sup>32</sup> contributing to a greater risk of overweight/obesity.

The observed socioeconomic differences in overweight/obesity prevalence is well-established finding, and consistent with most previous studies<sup>33-34</sup>. For example, women were found to have higher odds of being overweight/obese than men. Similar findings were observed in most studies in developing countries<sup>35-37</sup>. However, in some developed countries such as US and UK, it was found that adult men tend to be overweight/obese than adult women<sup>38-42</sup>. Contrastingly in developing countries such as Botswana adult women are generally noted to be overweight/obese than men at all ages<sup>26, 35, 39-40</sup>.

In the context of Botswana, observed gender differences in overweight/obesity in this study may be explained by sociocultural dynamics, whereby acculturation, through complex sociocultural pathways encourages weight gain among women<sup>26, 40</sup>. For example, in Botswana cultural values favour larger body size among women as a sign of fertility, healthfulness, or prosperity<sup>26</sup>. One indicative finding from this study was that women reported low levels of physical activity which may also contribute to observed high prevalence of overweight/obesity among them.

1  
2  
3 The study found that age is associated with overweight/obesity even after controlling  
4 for socioeconomic and behavioural factors. Overweight/obesity was highest among  
5 individuals aged 55-64 years but declined at ages 65+ years. This finding corroborates  
6 data from large population studies<sup>43-46</sup> which show that mean body weight and BMI  
7 gradually increases during most of adult life and reach peak values at 50–59 years of  
8 age in both men and women and after the age of 60 years, mean body weight and  
9 BMI tend to decrease<sup>47-49</sup>. In South Africa similar findings have been observed that  
10 overweight/obesity tends to increase with age<sup>21</sup>.

11  
12  
13  
14  
15  
16  
17  
18  
19  
20  
21  
22 Education differences were also observed for overweight/obesity. It was found that  
23 individuals who had high educational attainment had higher odds of overweight/obese  
24 than those with low education. This finding corroborates other studies which have  
25 shown that education may be associated with overweight/obesity via socioeconomic  
26 status, literacy and health behaviors<sup>50-52</sup>. There was no significant relationship  
27 observed between overweight/obesity and work and wealth status. Other studies in  
28 neighbouring countries with comparable Human Development Index (HDI) as  
29 Botswana including Namibia and South Africa<sup>27-28</sup> have also shown no wealth or work  
30 status differences in overweight/obesity. There are several reasons to such scenario.  
31 These reasons include; rapid and disorganized urbanization, increasing sedentary  
32 lifestyles, easy access to and consumption of unhealthy food and high energy drinks  
33 among both the poor and non-poor in these countries<sup>21, 27-28</sup>. Further to this a general  
34 observation has been made by Ford et al.<sup>52</sup> that overweight/obesity is no longer an  
35 issue of affluence in majority of low and middle income countries.

36  
37  
38  
39  
40  
41  
42  
43  
44  
45  
46  
47  
48  
49  
50  
51  
52  
53  
54 Further, the study noted that the odds of overweight/obesity were two times greater  
55 among smokers than non-smokers. Tuovinen *et al.*<sup>41</sup> based on literature review  
56 observed that heavy smokers tend to have greater body weight than do light smokers  
57  
58  
59  
60

1  
2  
3 or non-smokers, which likely reflect a clustering of other risky behaviours (e.g. low  
4 level of physical activity and poor diet) that is conducive to weight gain<sup>23-24</sup>. In this  
5 study, it was observed that smoking, especially among men clustered with poor diet  
6 and alcohol consumption. On the other hand some studies have shown that smoking  
7 tends to suppress appetite leading to low BMI among smokers<sup>10, 21, 30</sup>.

8  
9  
10  
11  
12  
13  
14  
15 Other important finding in this study is that overweight/obesity was significantly  
16 associated with poor physical activity. This is consistent with other studies which have  
17 shown that a decline in physical activity leads to adiposity<sup>52</sup>. The interpretation of this  
18 finding is that Botswana has undergone a transition from an agrarian to industrial  
19 society due to urbanization subsequently leading to industrial modernity.  
20 Consequently this has led to an increase in poor physical activity in the general  
21 population. Poor physical activity leads to overweight/obesity through energy  
22 imbalance between calories consumed and calories expended<sup>52</sup>. Generally formal  
23 physical activity that is planned, structured, repetitive, and purposeful is not common  
24 in Botswana. Consequently in order to increase physical activity and reduce  
25 overweight/obesity there is need for a population-based, multi-sectoral, multi-  
26 disciplinary, and culturally relevant approach.

## 27 28 29 30 31 32 33 34 35 36 37 38 39 40 41 42 43 **Conclusion**

44 Findings from this study indicate higher prevalence of overweight/obesity in Botswana.  
45 Key socioeconomic factors associated with overweight/obesity are being a woman,  
46 older, and with higher education (secondary and tertiary level education). Behavioral  
47 factors such as smoking and poor physical activity were found to be positively  
48 associated with overweight/obesity. These results demonstrate that socioeconomic  
49 and behavioural factors play an important role in prevalence of overweight/obesity in  
50 Botswana. Botswana's multisectoral national strategic plan implementation framework

1  
2  
3 for combating NCDs should focus on developing a community based and people  
4 centered awareness about the harmful impact of smoking, alcohol, physically inactivity  
5 and poor quality of diet facilitated by comprehensive national monitoring and evaluation  
6 framework.  
7  
8  
9  
10  
11  
12  
13  
14  
15  
16  
17  
18  
19  
20  
21  
22  
23  
24  
25  
26  
27  
28  
29  
30  
31  
32  
33  
34  
35  
36  
37  
38  
39  
40  
41  
42  
43  
44  
45  
46  
47  
48  
49  
50  
51  
52  
53  
54  
55  
56  
57  
58  
59  
60

For peer review only

## Acknowledgments

We wish to thank University of Botswana for affording us the time and resources to undertake this study. We also wish to thank the Office of Research of Development (ORD) at University of Botswana for providing funding for the survey on 'Chronic Non communicable Diseases in Botswana: Chronic disease prevalence, Health Care Utilization, Health Expenditure and the Life course' (NCD study) from which data for this article was derived. We also wish to thank the study participants.

## Contributors

MK conceived and undertook the study as part of his PhD research. KN was the lead investigator, while MK, GL, KB, SDR, LG, TM and RM were co-investigators and takes responsibility for the integrity of the data. KN, KB, and MK oversaw the NCD study design and data analysis. MK wrote the first draft of the article. All authors reviewed and approved the final draft of the article.

## Funding

The 'Chronic Non communicable Diseases in Botswana: Chronic disease prevalence, Health Care Utilization, Health Expenditure and the Life course' survey was supported by Office of Research and Development, Round 28 Funding.

## Disclaimer

The funding body had no role in the design of the study, analyses, interpretation or decision to submit the manuscript for publication.

## Competing Interests

Nil

## Participant consent

Obtained

## Ethics Approval

All ethical clearance formalities were completed before the start of the study. The study proposal along with the necessary documents was submitted to and approved by the Institutional Review Board of the University of Botswana (Ref #: UBR/RES/IRB/1583) and the Ministry of Health and Wellness (Ref #: HPDME: 13/18/1 Vol. X (130)). Privacy and confidentiality of highest standard were maintained by treating all respondents as anonymous and no names of respondents are mentioned or implied when presenting findings of the study.

## Data sharing statement

The dataset used and/or analysed during the current study is available from the corresponding author (Mpho Keetile) on reasonable request from the Office of Research and Development, University of Botswana.

## References

1. World Health Organization, The global status of overweight and obesity. *Fact Sheet*. Geneva. 2016.
2. Musaiger AO, Al-Hazzaa HM. Prevalence and risk factors associated with nutrition-related noncommunicable diseases in the Eastern Mediterranean region. *Int J Gen Med*. 2012;5:199-217.
3. Baldwin W, Kaneda T, Amato L, et al. Noncommunicable diseases and youth: a critical window of opportunity for Latin America and the Caribbean. Washington, DC: *Population Reference Bureau*; 2013.
4. Bhurosy T, Jeewon R. Overweight and obesity epidemic in developing countries: a problem with diet, physical activity, or socioeconomic status?. *ScientificWorldJournal*. 2014;;964236. doi:10.1155/2014/964236
5. Ford ND., Patel SA, Narayan KMV. Obesity in Low- and Middle-Income Countries: Burden, Drivers, and Emerging Challenges. *Annu. Rev. Public Health*. 2017; 38:145–64
6. Amugsi DA, Dimbuene ZT, Mberu B, et al. Prevalence and time trends in overweight and obesity among urban women: an analysis of demographic and health surveys data from 24 African countries, 1991–2014. *BMJ*;7:e017344. doi:10.1136/bmjopen-2017-017344.
7. Hruby A, Hu FB. The Epidemiology of Obesity: A Big Picture. *Pharmacoeconomics*. 2015;33(7):673-89.
8. Mamun A.A , Finlay J.E. Shifting of under-nutrition to over-nutrition and its determinants among women of reproductive ages in the 36 low to medium income countries. *Obes Res Clin Pract*. 2015; 9: 75-86.



- 1  
2  
3 9. Micklesfield LK, Lambert EV, Hume DJ, et al. Socio-cultural, environmental and  
4 behavioural determinants of obesity in black South African women. *Cardiovasc*  
5  
6 *J Afr.* 2013;24(9-10):369-75.  
7  
8  
9  
10 10. Biadgilign S, Mgotshini T, Haile D, Gebremichael B, Moges Y, Tilahun K.  
11  
12 Epidemiology of obesity and overweight in sub-Saharan Africa: a protocol for a  
13  
14 systematic review and meta-analysis. *BMJ Open.* 2017;7(11):e017666.  
15  
16  
17 11. Ball GD, Mushquash AR, Keaschuk RA, et al. Using intervention mapping to  
18  
19 develop the Parents as Agents of Change (PAC) intervention for managing  
20  
21 pediatric obesity. *BMC Res Notes* 2017;10:43.  
22  
23  
24 12. Kelly AS, Barlow SE, Rao G, et al. Severe obesity in children and adolescents:  
25  
26 identification, associated health risks, and treatment approaches: a scientific  
27  
28 statement from the American Heart Association. *Circulation.* 2013;128:1689–  
29  
30 712.  
31  
32  
33 13. World Health Organization (WHO). Obesity and overweight. *World Health*  
34  
35 *Organization, Geneva.* 2016.  
36  
37  
38 14. Levine J.A. Poverty and obesity in the U.S. *Diabetes.* 2011; 60:2667-2668.  
39  
40  
41 15. Kim J, Sharma SV, Park SK. Association between socioeconomic status and  
42  
43 obesity in adults: evidence from the 2001 to 2009 Korea national health and  
44  
45 nutrition examination survey. *J Prev Med Public Health.* 2014;47(2):94-103.  
46  
47  
48 16. You J, Choo J. Adolescent Overweight and Obesity: Links to Socioeconomic  
49  
50 Status and Fruit and Vegetable Intakes. *Int J Environ Res Public Health.*  
51  
52 2016;13(3):307.  
53  
54  
55 17. Maffetone PB, Laursen PB. The Prevalence of Overfat Adults and Children in  
56  
57 the US. *Front Public Health.* 2017;5:290.  
58  
59  
60

- 1  
2  
3 18. Lumsden MA, Hor K. Impact of obesity on the health of women in midlife. *The*  
4 *Obstetrician & Gynaecologist*. 2015; 17 (1):201–8.  
5  
6  
7  
8 19. Kim TJ, von dem Knesebeck O. Income and obesity: what is the direction of the  
9 relationship? A systematic review and meta-analysis. *BMJ Open*.  
10 2018;8(1):e019862.  
11  
12  
13 20. Hong I, Coker-Bolt P, Anderson KR, Lee D, Velozo CA. Relationship Between  
14 Physical Activity and Overweight and Obesity in Children: Findings From the  
15 2012 National Health and Nutrition Examination Survey National Youth Fitness  
16 Survey. *Am J Occup Ther*. 2016; 70(5):7005180060p1-8.  
17  
18  
19 21. Popkin BM, Slining MM. New dynamics in global obesity facing low- and middle-  
20 income countries. *Obesity Reviews: An Official Journal of the International*  
21 *Association for the Study of Obesity*. 2013; 14(02), 11–20.  
22 <http://doi.org/10.1111/obr.12102>.  
23  
24  
25 22. Dare S, Mackay DF, Pell JP. Relationship between Smoking and Obesity: A  
26 Cross-Sectional Study of 499,504 Middle-Aged Adults in the UK General  
27 Population. *PLoS ONE*. 2015; 10(4).  
28  
29  
30 23. Tuovinen EL, Saarni SE, Männistö S, et al. Smoking status and abdominal  
31 obesity among normal- and overweight/obese adults: Population-based  
32 FINRISK study. *Preventive Medicine Reports*. 2016;4(1), 324–330.  
33  
34  
35 24. Keetile M, Letamo G, Navaneetham K. Patterns and determinants of  
36 hypertension in Botswana, *J Public Health*. 2015; 23(1),311–318.  
37  
38  
39 25. Republic of Botswana. Chronic Disease Risk Surveillance Report 2010, Ministry  
40 of Health & WHO, *Government Printers*. 2010.  
41  
42  
43  
44  
45  
46  
47  
48  
49  
50  
51  
52  
53  
54  
55  
56  
57  
58  
59  
60

- 1  
2  
3 26. Letamo G. The prevalence of, and factors associated with, overweight and  
4 obesity in Botswana. *J Biosoc Sci.* 2011; 43(1):75-84.  
5  
6  
7 27. Peltzer K, Phaswana-Mafuya N. Fruit and vegetable intake and associated  
8 factors in older adults in South Africa. *Global Health Action*, 2012; 5(1), 1-8.  
9 doi:10.3402/gha.v5i0.18668  
10  
11 28. Nnyepi MS, Gwisai N, Lekgoa M, et al. Evidence of nutrition transition in  
12 Southern Africa. *Proc Nutr Soc.* 2015; 17 (1):1–9. doi:  
13 10.1017/S0029665115000051  
14  
15  
16  
17  
18 29. World Health Organization (WHO). Obesity and overweight. Geneva: *World*  
19 *Health Organization*, 2015.  
20  
21  
22  
23 30. GBD 2015 Risk Factors Collaborators. Global, regional, and national  
24 comparative risk assessment of 79 behavioural, environmental and  
25 occupational, and metabolic risks or clusters of risks, 1990-2015: a systematic  
26 analysis for the Global Burden of Disease Study 2015. *Lancet.* 2016;388  
27 (1):1659–724.  
28  
29  
30  
31  
32  
33  
34  
35 31. Agymang C, Boatemaa S, Frempong-Agymang G, et al. Obesity in Sub Saharan  
36 Africa. *Metabolic Syndrome.* Springer International Publishing, Switzerland. Ed.  
37 Rexford Ahima. 2015  
38  
39  
40  
41  
42 32. Amoah AG. Socio-demographic variations in obesity among Ghanaian adults.  
43 *Public Health Nutr.* 2003;6 (1):751-757  
44  
45  
46  
47 33. Biadgilign S, Mgutshini T, Haile D., et al. Epidemiology of obesity and overweight  
48 in sub-Saharan Africa: a protocol for a systematic review and meta-analysis.  
49 *BMJ Open*, 2017; 7(11).  
50  
51  
52  
53  
54 34. Cohen AK, Rai M, Rehkopf DH. et al. Educational attainment and obesity: A  
55 systematic review. *Obesity Reviews: An Official Journal of the International*  
56  
57  
58  
59  
60

- 1  
2  
3       *Association for the Study of Obesity*, 2013; 14(12), 989–1005.  
4  
5       <http://doi.org/10.1111/obr.12062>.  
6  
7  
8       35. Kanter R, Caballero B. Global Gender Disparities in Obesity: A Review of  
9       American Society for Nutrition. *Adv. Nutr.* 2012;3 (1): 491–498, 2012;  
10       doi:10.3945/an.112.002063.  
11  
12       36. Li L, Gower BA, Shelton RC, Wu X. Gender-Specific Relationship between  
13       Obesity and Major Depression. *Front Endocrinol (Lausanne)*. 2017;8 (1):292.  
14  
15       37. Pinto KA, Griep RH, Rotenberg L, Almeida MDCC. et al. Correction: Gender,  
16       time use and overweight and obesity in adults: Results of the Brazilian  
17       Longitudinal Study of Adult Health (ELSA-Brasil). *PLOS ONE* 2018;13(8):  
18       e0198380.  
19  
20       38. Luppino FS, de Wit LM, Bouvy PF. et al. Overweight, obesity, and depression:  
21       a systematic review and meta-analysis of longitudinal studies. *Arch Gen*  
22       *Psychiatry*. 2010; 67(1):220–9.  
23  
24       39. The GBD 2015 Obesity Collaborators. Health Effects of Overweight and Obesity  
25       in 195 Countries over 25 Years. *N Engl J Med* 2017; 377:13-27.  
26  
27       40. Kamadjeu RM, Edwards R, Atanga JS, Kiawi EC, Unwin N, Mbanya J-C.  
28       Anthropometry measures and prevalence of obesity in the urban adult  
29       population of Cameroon: an update from the Cameroon Burden of Diabetes  
30       Baseline Survey. *BMC Public Health*. 2006;6.  
31  
32       41. Tuovinen EL, Saarni SE, Männistö S, et al. Smoking status and abdominal  
33       obesity among normal- and overweight/obese adults: Population-based  
34       FINRISK study. *Prev Med Rep*. 2016; 4:324–330.  
35  
36  
37  
38  
39  
40  
41  
42  
43  
44  
45  
46  
47  
48  
49  
50  
51  
52  
53  
54  
55  
56  
57  
58  
59  
60

- 1  
2  
3 42. Flegal KM, Carroll MD, Kuczmarski RJ, et al. Overweight and obesity in the  
4 United States: prevalence and trends, 1960–1994. *Int J Obes Relat Metab*  
5 *Disord*; 1998; 22 (1):39–47.  
6  
7  
8  
9  
10 43. Villareal DT, Apovian CM, Kushner RF, et al. Obesity in older adults: technical  
11 review and position statement of the American Society for Nutrition and NAASO,  
12 The Obesity Society, *The American Journal of Clinical Nutrition*, 2005 82 (5),  
13 923–934  
14  
15  
16  
17  
18  
19  
20 44. Sperrin M, Marshall AD, Higgins V. et al. Body mass index relates weight to  
21 height differently in women and older adults: serial cross-sectional surveys in  
22 England (1992-2011). *J Public Health (Oxf)*. 2016;38(3):607-613.  
23  
24  
25  
26  
27 45. Vazquez G, Duval S, Jacobs DR, et al. Comparison of Body Mass Index, Waist  
28 Circumference, and Waist/Hip Ratio in Predicting Incident Diabetes: A Meta-  
29 Analysis, *Epidemiologic Reviews*, 2007; 29(1).115–128.  
30  
31  
32  
33  
34 46. Emerging Risk Factors Collaboration, Wormser D, Kaptoge S, et al. Separate  
35 and combined associations of body-mass index and abdominal adiposity with  
36 cardiovascular disease: collaborative analysis of 58 prospective studies. *Lancet*.  
37 2011;377(9771):1085-95.  
38  
39  
40  
41  
42  
43  
44 47. Morio B, Barra V, Ritz P. et al. Benefit of endurance training in elderly people  
45 over a short period is reversible. *Eur J Appl Physiol* 2000; 81(1): 329.  
46  
47  
48  
49 48. Fletcher J, Frisvold D. Higher education and health investments: Does more  
50 schooling affect preventive health care use. *Journal Capital*. 2009; 3(2):144–  
51 176.  
52  
53  
54  
55  
56 49. Cohen AK, Rai M, Rehkopf DH, et al. Educational attainment and obesity: a  
57 systematic review. *Obes Rev*. 2013;14(12):989-1005.  
58  
59  
60

- 1  
2  
3 50. Devaux M, Sassi F, Church J, et al. (2011), "Exploring the Relationship between  
4 Education and Obesity", *OECD Journal: Economic Studies*, Vol. 2011/1.  
5  
6  
7  
8 51. Traversy G, Jean-Philippe C. Alcohol Consumption and Obesity: An Update,  
9  
10 *Curr Obes Rep.* 2015; 4 (1):122–130.  
11  
12  
13 52. Ford ND, Patel SA, Narayan KM. Obesity in Low- and Middle-Income Countries:  
14  
15 Burden, Drivers, and Emerging Challenges. *Annu Rev Public Health.*  
16  
17 2017;20(38):145-164.  
18  
19  
20  
21  
22  
23  
24  
25  
26  
27  
28  
29  
30  
31  
32  
33  
34  
35  
36  
37  
38  
39  
40  
41  
42  
43  
44  
45  
46  
47  
48  
49  
50  
51  
52  
53  
54  
55  
56  
57  
58  
59  
60

STROBE Statement—Checklist of items that should be included in reports of *cross-sectional studies*

| Title and abstract | Item No | Recommendation                                                                                                                                                                                                                                                                                                                                                                                                                                                                                                                                           |
|--------------------|---------|----------------------------------------------------------------------------------------------------------------------------------------------------------------------------------------------------------------------------------------------------------------------------------------------------------------------------------------------------------------------------------------------------------------------------------------------------------------------------------------------------------------------------------------------------------|
|                    | 1       | <p><b>(a) Socioeconomic and behavioural determinants of overweight/obesity among adults in Botswana: A cross-sectional study</b></p>                                                                                                                                                                                                                                                                                                                                                                                                                     |
|                    |         | <p><b>(b) Objective</b></p>                                                                                                                                                                                                                                                                                                                                                                                                                                                                                                                              |
|                    |         | <p>To undertake a comprehensive assessment of socioeconomic and behavioural determinants of overweight/obesity among adult population in Botswana.</p>                                                                                                                                                                                                                                                                                                                                                                                                   |
|                    |         | <p><b>Design</b></p>                                                                                                                                                                                                                                                                                                                                                                                                                                                                                                                                     |
|                    |         | <p>The study adopted a cross-sectional design by selecting adult respondents in three cities and towns, fifteen urban villages and fifteen rural areas across Botswana using a multistage probability sampling technique.</p>                                                                                                                                                                                                                                                                                                                            |
|                    |         | <p><b>Setting</b></p>                                                                                                                                                                                                                                                                                                                                                                                                                                                                                                                                    |
|                    |         | <p>The study was conducted in selected rural and urban areas of Botswana.</p>                                                                                                                                                                                                                                                                                                                                                                                                                                                                            |
|                    |         | <p><b>Participants</b></p>                                                                                                                                                                                                                                                                                                                                                                                                                                                                                                                               |
|                    |         | <p>The study sample consisted of 1178 adult males and females aged 15 years and above.</p>                                                                                                                                                                                                                                                                                                                                                                                                                                                               |
|                    |         | <p><b>Primary Outcome Measures</b></p>                                                                                                                                                                                                                                                                                                                                                                                                                                                                                                                   |
|                    |         | <p>Objectively measured overweight/obesity.</p>                                                                                                                                                                                                                                                                                                                                                                                                                                                                                                          |
|                    |         | <p><b>Results</b></p>                                                                                                                                                                                                                                                                                                                                                                                                                                                                                                                                    |
|                    |         | <p>Prevalence of overweight/obesity in the study population was estimated at 41%. The adjusted odds ratio (AOR) of overweight/obesity were highest among women (AOR=2.74, 95% C.I. =1.92-3.90), in ages 55-64 years (AOR=5.53, 95% C.I. = 2.62-11.6), among individuals with secondary (AOR=1.70, 95% C.I. = 1.11-2.61) and tertiary education (AOR=1.99, 95% C.I. =1.16-3.38), smokers (AOR=2.16, 95% C.I. = 1.22-3.83) and people with poor physically activity (AOR=1.46, 95% C.I. =1.03-3.24). These were statistically significant at 5% level.</p> |
|                    |         | <p><b>Conclusion</b></p>                                                                                                                                                                                                                                                                                                                                                                                                                                                                                                                                 |
|                    |         | <p>Being female, elderly, of high education levels, a smoker and having poor physical activity were identified as key factors for prevalence of overweight/obesity. These findings suggest the need for broad based strategies encouraging physical activity among different socioeconomic groups.</p>                                                                                                                                                                                                                                                   |
|                    |         | <p><b>Key words</b></p>                                                                                                                                                                                                                                                                                                                                                                                                                                                                                                                                  |
|                    |         | <p><b>Overweight, Obesity, socioeconomic, behavioural, Botswana</b></p>                                                                                                                                                                                                                                                                                                                                                                                                                                                                                  |
|                    |         | <p><b>Strengths and Limitations of the study</b></p>                                                                                                                                                                                                                                                                                                                                                                                                                                                                                                     |
|                    |         | <ul style="list-style-type: none"> <li>○ To our knowledge this is the first cross-sectional study in Botswana to comprehensively assess both the socioeconomic and behavioural determinants of overweight/obesity among adults.</li> </ul>                                                                                                                                                                                                                                                                                                               |
|                    |         | <ul style="list-style-type: none"> <li>○ Data were collected from a large and randomly selected representative population. The data contained information on potential confounding factors, with a low proportion of missing information making the study more comparable.</li> </ul>                                                                                                                                                                                                                                                                    |
|                    |         | <ul style="list-style-type: none"> <li>○ As the cross sectional design was employed, the causal relationship between an explanatory and an outcome variable was not established.</li> </ul>                                                                                                                                                                                                                                                                                                                                                              |

**Introduction**



|                              |    |                                                                                                                                                                                                                                                                                                                                                                                                                                                                                                                                                                                                                                                                                                                                                                                                                                                                                                                                                                                            |
|------------------------------|----|--------------------------------------------------------------------------------------------------------------------------------------------------------------------------------------------------------------------------------------------------------------------------------------------------------------------------------------------------------------------------------------------------------------------------------------------------------------------------------------------------------------------------------------------------------------------------------------------------------------------------------------------------------------------------------------------------------------------------------------------------------------------------------------------------------------------------------------------------------------------------------------------------------------------------------------------------------------------------------------------|
| Background/rationale         | 2  | The Botswana WHO STEPS surveys conducted in 2007 and 2014 have shown increasing levels of overweight/obesity in the general adult population of Botswana. Prevalence of overweight/obesity was 18.7% in 2007 and increased to 38.6 % in 2014. Despite evidence of the high prevalence of overweight/obesity in Botswana, there is little evidence of socioeconomic and behavioural determinants of overweight/obesity. To the best of our knowledge this is the first cross sectional study which takes into account both socioeconomic and behavioural factors for understanding the heterogeneity of overweight/obesity in Botswana. The reduction of overweight/obesity prevalence should be a key goal of health-care policy because of its association with many NCDs.                                                                                                                                                                                                                |
| Objectives                   | 3  | The main objective of this study was to assess socioeconomic and behavioural determinants associated with overweight/obesity prevalence in Botswana.                                                                                                                                                                                                                                                                                                                                                                                                                                                                                                                                                                                                                                                                                                                                                                                                                                       |
| <b>Methods</b>               |    |                                                                                                                                                                                                                                                                                                                                                                                                                                                                                                                                                                                                                                                                                                                                                                                                                                                                                                                                                                                            |
| Study design                 | 4  | The study used cross sectional design, and employed stratified multistage probability sampling technique to select respondents in three cities and towns, fifteen urban villages and fifteen rural areas across Botswana.                                                                                                                                                                                                                                                                                                                                                                                                                                                                                                                                                                                                                                                                                                                                                                  |
| Setting                      | 5  | Data was collected in March 2016, in cities/towns, urban and rural villages of Botswana.                                                                                                                                                                                                                                                                                                                                                                                                                                                                                                                                                                                                                                                                                                                                                                                                                                                                                                   |
| Participants                 | 6  | A total sample of 1178 males and females aged 15 years were selected and included as sample for the survey using the Kish Grid Technique.                                                                                                                                                                                                                                                                                                                                                                                                                                                                                                                                                                                                                                                                                                                                                                                                                                                  |
| Variables                    | 7  | Overweight/obesity was the outcome variables, other NCDs risk factors such as alcohol consumption, smoking, poor fruit and vegetable consumption, and poor physical activity. Other socioeconomic covaraiates such as sex, age, work status, residence, education and marital status were used as controls.                                                                                                                                                                                                                                                                                                                                                                                                                                                                                                                                                                                                                                                                                |
| Data sources/<br>measurement | 8* | N/A                                                                                                                                                                                                                                                                                                                                                                                                                                                                                                                                                                                                                                                                                                                                                                                                                                                                                                                                                                                        |
| Bias                         | 9  | Validity of data collection tool was done through pretest prior to the survey                                                                                                                                                                                                                                                                                                                                                                                                                                                                                                                                                                                                                                                                                                                                                                                                                                                                                                              |
| Study size                   | 10 | The sample size of the study was calculated using the sample size calculator and yielding a sample size of 1280. The sample size is powered to produce estimates for Botswana and for broad socioeconomic categories. The final selection of respondents for inclusion in the study was that 28.5% of the respondents were recruited from cities and towns, 47.3% from urban villages and 24.1% from rural villages. This is proportionate to the size of the population as estimated during the 2011 Botswana Population and Housing Census.<br>Hence the total respondents from towns and cities= $28.5/100*1280=365$ respondents; $47.3/100*1280=606$ respondents from urban villages, and a total of $24.1/100*1280=309$ respondents from rural villages were targeted.<br>Furthermore, the selection of the sample within each enumeration area is calculated in relation to the proportion of population in that district. E.g. for Gaborone = $178654/226649*365=288$ (see table1). |

Table 1: Summary of sampled districts with their enumeration areas and proportion of study respondents.

| Proposed Localities | Population aged 15-65 years (2011 Census) | Proposed Number of EA's | Proposed Number of Population Aged 15-65 years |
|---------------------|-------------------------------------------|-------------------------|------------------------------------------------|
|---------------------|-------------------------------------------|-------------------------|------------------------------------------------|



|                                      |               |           |            |
|--------------------------------------|---------------|-----------|------------|
| <b>Cities and Towns<br/>(324291)</b> | <b>226049</b> | <b>18</b> | <b>365</b> |
| Gaborone                             | 178654        | 14        | 288        |
| Selebi-Phikwe                        | 34093         | 3         | 55         |
| Jwaneng                              | 13302         | 1         | 21         |
|                                      |               |           |            |
| <b>Urban Villages<br/>(538585)</b>   | <b>271900</b> | <b>30</b> | <b>606</b> |
| Kanye                                | 31108         | 3         | 69         |
| Letlhakeng                           | 5439          | 1         | 12         |
| Maitengwe                            | 2969          | 0         | 7          |
| Maun                                 | 40796         | 5         | 91         |
| Mochudi                              | 29331         | 3         | 65         |
| Molepolole                           | 43103         | 5         | 96         |
| Serowe                               | 35614         | 4         | 79         |
| Tsabong                              | 6131          | 1         | 14         |
| Tlokeng                              | 28211         | 3         | 63         |
| Tutume                               | 10626         | 1         | 24         |
| Kopong                               | 6856          | 1         | 15         |
| Mmadimare                            | 9192          | 1         | 20         |
| Lerala                               | 3943          | 0         | 9          |
| Gumare                               | 5180          | 1         | 12         |
| Thamaga                              | 13401         | 1         | 30         |
|                                      |               |           |            |
| <b>Rural Villages<br/>(274363)</b>   | <b>21702</b>  | <b>15</b> | <b>309</b> |
| Nthanthe                             | 1321          | 1         | 19         |
| Ditshegwane                          | 1209          | 1         | 17         |
| Senete                               | 1415          | 1         | 20         |
| Sehithwa                             | 2928          | 2         | 42         |
| Mathubudukwane                       | 1233          | 1         | 18         |
| Serinane                             | 358           | 0         | 5          |
| Moiyabana                            | 3014          | 2         | 43         |
| Werda                                | 1905          | 1         | 27         |
| Dikwididi                            | 225           | 0         | 3          |
| Makuta                               | 464           | 0         | 7          |
| Kgope                                | 521           | 0         | 7          |
| Tobane                               | 1455          | 1         | 21         |
| Maunatlala                           | 2871          | 2         | 41         |
| Etsha 6                              | 2783          | 2         | 40         |
| Kubung                               | 188           | 0         | 3          |

For each selected EA, 20 households were selected using systematic sampling method. This followed guidelines used in most Demographic Health Surveys where 20-25 households (hhs) were selected from the primary sampling units (PSUs). For instance, in the case of cities and town;  $365/20=18$  EAs. The above procedure was followed for all districts, where each of the sampled EAs, 20 households were selected using systematic sampling method. The Kish grid was used to select the eligible respondents

from the selected households. Thus, once a household is selected, the interviewer created a listing (sampling frame) of all the persons in the household that are eligible for the interview process. This listing includes the name of the person, their gender, their relationship to the head of the household and their age. Once the listing was done, each eligible member was assigned a unique number. Then using a randomized response table a particular member was chosen for the interview.

|                        |     |                                                                                                                                                                                                                                                                                                                                                                                                                                                                                                                                                                                                                                                                                                                                                                                                                                                                                                                                                                                                                                                                                                                                                                                                                                                                                               |
|------------------------|-----|-----------------------------------------------------------------------------------------------------------------------------------------------------------------------------------------------------------------------------------------------------------------------------------------------------------------------------------------------------------------------------------------------------------------------------------------------------------------------------------------------------------------------------------------------------------------------------------------------------------------------------------------------------------------------------------------------------------------------------------------------------------------------------------------------------------------------------------------------------------------------------------------------------------------------------------------------------------------------------------------------------------------------------------------------------------------------------------------------------------------------------------------------------------------------------------------------------------------------------------------------------------------------------------------------|
| Quantitative variables | 11  | Refer to 7 above                                                                                                                                                                                                                                                                                                                                                                                                                                                                                                                                                                                                                                                                                                                                                                                                                                                                                                                                                                                                                                                                                                                                                                                                                                                                              |
| Statistical methods    | 12  | <p>(a) Key two methods of data analysis were employed in the study: Bivariate analysis and logistic regression analysis to assess determinants of overweight/obesity</p> <p>(b) An analysis of the interaction effects was done before variables were included for analysis in logistic regression model.</p> <p>(c) None of the variables used in this study had a missing rate of more than 10%. This was within the cut-off from the literature regarding an acceptable percentage of missing data in a data set for valid statistical inferences (see, Schaffer 1999 &amp; Bennett 2001 for example)</p> <p>(d) For sampling strategy, refer to attached file on the NCD study for methodology</p> <p>(e) N./A</p>                                                                                                                                                                                                                                                                                                                                                                                                                                                                                                                                                                        |
| <b>Results</b>         |     |                                                                                                                                                                                                                                                                                                                                                                                                                                                                                                                                                                                                                                                                                                                                                                                                                                                                                                                                                                                                                                                                                                                                                                                                                                                                                               |
| Participants           | 13* | <p>(a) Report numbers of individuals at each stage of study—eg numbers potentially eligible, examined for eligibility, confirmed eligible, included in the study, completing follow-up, and analysed-N/A</p> <p>(b) Give reasons for non-participation at each stage-N/A</p> <p>(c) Consider use of a flow diagram-N/A</p>                                                                                                                                                                                                                                                                                                                                                                                                                                                                                                                                                                                                                                                                                                                                                                                                                                                                                                                                                                    |
| Descriptive data       | 14* | <p>(a) A total of 1,178 respondents between the ages of 15 years and above were successfully interviewed. The sample constituted a high proportion of females (69.1%) than males (30.9%). The sample age distribution suggests a relatively young population, with over half (59%) of the sample being less than 39 years of age, and almost three quarters (73.5%) being less than fifty years of age. As age increases, the sample skewed in favour of females.</p> <p>More than two fifths (45.4%) of the population resided in urban villages; while the remaining proportion resided in cities and towns (30.2%), and rural areas (24.5%). Almost three quarters (73.8%) of respondents were never married; over a third (35.5%) had primary education or less; over a quarter (27.2%) had junior secondary education while just under a fifth had senior secondary education (17.3%) and tertiary education (19.9%). Close to two fifth (37.5%) in the sample were not employed; over a quarter were employed in either the public or private sector (26.2%) while the remaining proportion were either self-employed (11.2%) , home makers or students (18.2%) and retirees (6.4%).</p> <p>(b) Indicate number of participants with missing data for each variable of interest-N/A</p> |
| Outcome data           | 15* | Report numbers of outcome events or summary measures-N/A                                                                                                                                                                                                                                                                                                                                                                                                                                                                                                                                                                                                                                                                                                                                                                                                                                                                                                                                                                                                                                                                                                                                                                                                                                      |
| Main results           | 16  | (a) It was observed that gender had a significant association with overweight/obesity when controlling for both socioeconomic and behavioural factors. Women were observed to have more than 2 times (AOR=2.74, 95% C.I. =1.92-3.90) greater odds for overweight/obesity than men.                                                                                                                                                                                                                                                                                                                                                                                                                                                                                                                                                                                                                                                                                                                                                                                                                                                                                                                                                                                                            |

The odds of being overweight/obese increased with age after controlling for socioeconomic and behavioural factors and were highest among individuals aged 55-64 years (AOR=5.53, 95% C.I. = 2.62-11.6), but declined at ages 65+ years (AOR=2.88, 95% C.I. = 1.21-6.86). Education was also found to be a significant factor associated with overweight/obesity in the study population after controlling for socioeconomic covariates. Further, individuals who had secondary (AOR=1.70, 95% C.I. = 1.11-2.61) and tertiary or higher education (AOR=1.99, 95% C.I. =1.16-3.38) were found to have higher probability of being overweight/obese than individuals with primary or less education. Meanwhile, there was no significant relationship observed between work status, wealth status and overweight/obesity in the general study population.

The association between smoking and alcohol consumption with overweight/obesity was found to be negative in the crude model. However, controlling for other socioeconomic and demographic factors, the odds of overweight/obesity increased two times (AOR=2.16, 95% C.I. = 1.22-3.83) among smokers than non-smokers. Overweight/obesity was also significantly associated with poor physical activity (AOR=1.46, 95% C.I. =1.03-3.24) after adjusting for socioeconomic and behavioural factors.

(b) Report category boundaries when continuous variables were categorized-N/A

(c) If relevant, consider translating estimates of relative risk into absolute risk for a meaningful time period-N/A

|                          |    |                                                                                                                                                                                                                                                                                                                                                                                                                                                                                                                                                                                                                                                                                                                                                                                     |
|--------------------------|----|-------------------------------------------------------------------------------------------------------------------------------------------------------------------------------------------------------------------------------------------------------------------------------------------------------------------------------------------------------------------------------------------------------------------------------------------------------------------------------------------------------------------------------------------------------------------------------------------------------------------------------------------------------------------------------------------------------------------------------------------------------------------------------------|
| Other analyses           | 17 | Report other analyses done—eg analyses of subgroups and interactions, and sensitivity analyses-N/A                                                                                                                                                                                                                                                                                                                                                                                                                                                                                                                                                                                                                                                                                  |
| <b>Discussion</b>        |    |                                                                                                                                                                                                                                                                                                                                                                                                                                                                                                                                                                                                                                                                                                                                                                                     |
| Key results              | 18 | Key socioeconomic factors associated with overweight/obesity are being a woman, older, and with higher education (secondary and tertiary level education). Behavioral factors such as smoking and poor physical activity were found to be positively associated with overweight/obesity. These results demonstrate that socioeconomic and behavioural factors play an important role in prevalence of overweight/obesity in Botswana. Botswana's multisectoral national strategic plan implementation framework for combating NCDs should focus on developing a community based and people centered awareness about the harmful impact of smoking, alcohol, physical inactivity and poor quality of diet facilitated by comprehensive national monitoring and evaluation framework. |
| Limitations              | 19 | The study employed a cross-sectional study design and the main limitation is that because data on each participant was recorded only once it was difficult to infer the temporal association between an explanatory and an outcome variable. Therefore, only an association, and not causation, can be inferred from this study.                                                                                                                                                                                                                                                                                                                                                                                                                                                    |
| Interpretation           | 20 | Limitations of self-reported data such as under and over-reporting were borne in mind when interpreting results of the study                                                                                                                                                                                                                                                                                                                                                                                                                                                                                                                                                                                                                                                        |
| Generalisability         | 21 | The NCDs study sample was not designed to be representative of Botswana, and we are cautious about generalizing these study findings                                                                                                                                                                                                                                                                                                                                                                                                                                                                                                                                                                                                                                                |
| <b>Other information</b> |    |                                                                                                                                                                                                                                                                                                                                                                                                                                                                                                                                                                                                                                                                                                                                                                                     |
| Funding                  | 22 | The NCDs study was funded by Office of Research and Development at University of Botswana. However, the funder does not have any influence or say in the present article.                                                                                                                                                                                                                                                                                                                                                                                                                                                                                                                                                                                                           |

1  
2 \*Give information separately for exposed and unexposed groups.  
3

4 **Note:** An Explanation and Elaboration article discusses each checklist item and gives methodological background and  
5 published examples of transparent reporting. The STROBE checklist is best used in conjunction with this article (freely  
6 available on the Web sites of PLoS Medicine at <http://www.plosmedicine.org/>, Annals of Internal Medicine at  
7 <http://www.annals.org/>, and Epidemiology at <http://www.epidem.com/>). Information on the STROBE Initiative is  
8 available at [www.strobe-statement.org](http://www.strobe-statement.org).  
9  
10  
11  
12  
13  
14  
15  
16  
17  
18  
19  
20  
21  
22  
23  
24  
25  
26  
27  
28  
29  
30  
31  
32  
33  
34  
35  
36  
37  
38  
39  
40  
41  
42  
43  
44  
45  
46  
47  
48  
49  
50  
51  
52  
53  
54  
55  
56  
57  
58  
59  
60

# BMJ Open

## Socioeconomic and behavioural determinants of overweight/obesity among adults in Botswana: A cross-sectional study

|                                 |                                                                                                                                                                                                                                                                                                                                                                                                                                                                                                                                                        |
|---------------------------------|--------------------------------------------------------------------------------------------------------------------------------------------------------------------------------------------------------------------------------------------------------------------------------------------------------------------------------------------------------------------------------------------------------------------------------------------------------------------------------------------------------------------------------------------------------|
| Journal:                        | <i>BMJ Open</i>                                                                                                                                                                                                                                                                                                                                                                                                                                                                                                                                        |
| Manuscript ID                   | bmjopen-2019-029570.R2                                                                                                                                                                                                                                                                                                                                                                                                                                                                                                                                 |
| Article Type:                   | Original research                                                                                                                                                                                                                                                                                                                                                                                                                                                                                                                                      |
| Date Submitted by the Author:   | 11-Sep-2019                                                                                                                                                                                                                                                                                                                                                                                                                                                                                                                                            |
| Complete List of Authors:       | Keetile, Mpho; University of Botswana, Population Studies<br>Navaneetham, Kannan; University of Botswana, Department of Population Studies<br>Letamo, Gobopamang; University of Botswana, Population Studies<br>Bainame, Kenabetsho; University of Botswana, Population Studies<br>Rakgoasi, Serai; University of Botswana, Population Studies<br>Gabaitiri, Lesego; University of Botswana, Statistics<br>Masupe, Tiny; University of Botswana Faculty of Health Sciences, School of Medicine<br>Molebatsi, Robert; University of Botswana, Sociology |
| <b>Primary Subject Heading</b>: | Public health                                                                                                                                                                                                                                                                                                                                                                                                                                                                                                                                          |
| Secondary Subject Heading:      | Epidemiology, Global health                                                                                                                                                                                                                                                                                                                                                                                                                                                                                                                            |
| Keywords:                       | Overweight, Obesity, Socioeconomic, Behavioural, Botswana                                                                                                                                                                                                                                                                                                                                                                                                                                                                                              |
|                                 |                                                                                                                                                                                                                                                                                                                                                                                                                                                                                                                                                        |

SCHOLARONE™  
Manuscripts

1  
2  
3  
4  
5 **Socioeconomic and behavioural determinants of overweight/obesity**  
6 **among adults in Botswana: A cross-sectional study**  
7  
8

9 Mpho Keetile<sup>1</sup>, Kannan Navaneetham<sup>1</sup>, Gobopamang Letamo<sup>1</sup>, Kenabetsho  
10 Bainame<sup>1</sup>, Serai Daniel Rakgoasi<sup>1</sup>, Lesego Gabaitiri<sup>2</sup>, Tiny Masupe<sup>3</sup>, Robert  
11 Molebatsi<sup>4</sup>.  
12  
13

14  
15 **Author Affiliations**  
16

17 <sup>1</sup>Department of Population Studies, University of Botswana, Gaborone, Botswana

18 <sup>2</sup>Department of Statistics, University of Botswana, Gaborone, Botswana

19 <sup>3</sup>School of Medicine, University of Botswana, Gaborone, Botswana

20 <sup>4</sup>Department of Sociology, University of Botswana, Gaborone  
21  
22  
23  
24

25 **Corresponding author**  
26

27 Mpho Keetile, Department of Population Studies, Private Bag 00705, University of  
28 Botswana, Gaborone, Botswana. email: mphokeet@yahoo.com. Tel: +26771231375  
29  
30  
31  
32  
33  
34  
35  
36  
37  
38  
39  
40  
41  
42  
43  
44  
45  
46  
47  
48  
49  
50  
51  
52  
53  
54  
55  
56  
57  
58  
59  
60

**Word count: 3871**

## Abstract

### Objective

To undertake a comprehensive assessment of socioeconomic and behavioural determinants of overweight/obesity among adult population in Botswana.

### Design

The study adopted a cross-sectional design by selecting adult respondents in three cities and towns, fifteen urban villages and fifteen rural areas across Botswana using a multistage probability sampling technique.

### Setting

The study was conducted in selected rural and urban areas of Botswana.

### Participants

The study sample consisted of 1178 adult males and females aged 15 years and above.

### Primary Outcome Measures

Objectively measured overweight/obesity.

### Results

Prevalence of overweight/obesity in the study population was estimated at 41%. The adjusted odds ratio (AOR) of overweight/obesity were highest among women (AOR=2.74, 95% C.I. =1.92-3.90), in ages 55-64 years (AOR=5.53, 95% C.I. = 2.62-11.6), among individuals with secondary (AOR=1.70, 95% C.I. = 1.11-2.61) and tertiary education (AOR=1.99, 95% C.I. =1.16-3.38), smokers (AOR=2.16, 95% C.I. = 1.22-3.83) and people with poor physically activity (AOR=1.46, 95% C.I. =1.03-3.24). These were statistically significant at 5% level.

## Conclusion

Women, older adults, people with high education level, smokers and people who reported poor physical activity were found to have higher odds of being overweight/obesity. These findings suggest the need for broad based strategies encouraging physical activity among different socioeconomic groups.

## Key words

**Overweight, Obesity, socioeconomic, behavioural, Botswana**

## Strengths and Limitations of the study

- To our knowledge this is the first cross-sectional study in Botswana to comprehensively assess both the socioeconomic and behavioural determinants of overweight/obesity among adults.
- Data were collected from a large and randomly selected representative population. The data contained information on potential confounding factors, with a low proportion of missing information making the study more comparable.
- As the cross sectional design was employed, the causal relationship between an explanatory and an outcome variable was not established.



## Introduction

The disease profile in Botswana is changing, with most deaths and disability in the foreseeable future likely to be accounted for by non-communicable diseases (NCDs). Children, adults and the elderly are all vulnerable to the risk factors that contribute to NCDs especially overweight/obesity, due to unhealthy diets, low physical activity, exposure to tobacco smoke and/or the effects of the harmful use of alcohol<sup>1-3</sup>. The key drivers of NCDs are ageing, rapid urbanisation and the globalisation of unhealthy lifestyles. Globalization of unhealthy lifestyles like unhealthy diets may show up in individuals as raised blood pressure, increased blood glucose, elevated blood lipids, and overweight/ obesity<sup>1</sup>.

Several studies have recently shown that many low income and middle-income countries (LMICs) are experiencing an increase in the prevalence of overweight/obesity<sup>4-6</sup>. This prevalence is predicted to continue to increase in the future. Much of the increase in prevalence levels for overweight/obesity is expected in countries such as India, some parts of South-East Asia, China, most of South America and some parts of Sub Saharan Africa (SSA)<sup>7-8</sup>. Until recently, SSA was minimally affected by the overweight/obesity epidemic due to under-nutrition and a major burden of Human Immunodeficiency Virus (HIV) and tuberculosis (TB)<sup>9</sup>. Meanwhile research on overweight/obesity has started to gain significance in SSA<sup>10-14</sup> due to its increasing magnitude.

It has been shown by previous studies that socioeconomic and behavioural factors have a significant association with overweight/obesity<sup>15-16</sup>. These studies have shown that socioeconomic and demographic factors such as sex, age, education level, work status, place of residence and wealth status are determinants of

1  
2  
3 overweight/obesity. Studies have found that women are more likely to be  
4  
5 overweight/obese than men, while the odds of being overweight/obesity has been  
6  
7 seen to increase with age<sup>17-19</sup>. It has also been observed that being employed  
8  
9 in a high income job, residing in urban areas, having high education and wealth  
10  
11 status are significantly associated with overweight/obesity<sup>20</sup>.  
12  
13  
14  
15  
16

17 The review of literature suggests significant association between a number of  
18  
19 behavioural factors and overweight/obesity. For example, significant positive  
20  
21 association was found between physical inactivity and overweight/obesity<sup>21</sup>. Further,  
22  
23 studies have noted that the association between physical inactivity and health  
24  
25 outcomes such as overweight/obesity is moderated by other lifestyle factors,  
26  
27 especially sedentary lifestyle<sup>15, 20, 21</sup>. In most developing countries, there has been a  
28  
29 substantial shift from jobs with high-energy expenditure such as farming, mining and  
30  
31 forestry to more-sedentary sectors of manufacturing, services and office based-  
32  
33 work<sup>22</sup>. This shift has contributed to risky lifestyle behaviours condoning alcohol  
34  
35 consumption, poor diets and smoking<sup>23-24</sup>.  
36  
37  
38  
39  
40  
41

42 The Botswana World Health Organization (WHO) STEPS surveys conducted in 2007  
43  
44 and 2014 have shown rising levels of overweight/obesity among adult population of  
45  
46 Botswana. The estimated prevalence of overweight/obesity was 18.7% in 2007<sup>25</sup> and  
47  
48 increased to 38.6 % in 2014<sup>26</sup>. Despite evidence of the high and rising prevalence of  
49  
50 overweight/obesity in Botswana, there is little evidence examining the association  
51  
52 between socioeconomic and behavioural factors, and overweight/obesity. To the  
53  
54 best of our knowledge, this is the first cross sectional study which takes into account  
55  
56 both socioeconomic and behavioural factors together for understanding the  
57  
58  
59  
60

1  
2  
3 determinants of overweight/obesity. The study would be significant in the context that  
4  
5 the reduction of overweight/obesity prevalence should be a key goal of health-care  
6  
7 policy because of its associated causes with many NCDs. Keeping this view, the  
8  
9 main aim of this study was to examine the association between socioeconomic and  
10  
11 behavioural factors, and overweight/obesity in Botswana.  
12  
13  
14  
15  
16

## 17 **Methods**

### 18 ***Sampling, recruitment and ethics***

19  
20  
21  
22  
23 The study used cross sectional design by selecting respondents in three cities and  
24  
25 towns, fifteen urban villages and fifteen rural areas across Botswana using a  
26  
27 multistage probability sampling technique. A list of districts, localities and  
28  
29 enumeration areas (EAs) together with their households was prepared based on the  
30  
31 2011 Botswana Population and Housing census that form a sampling frame. At the  
32  
33 first stage, population was stratified into cities and towns, urban villages and rural  
34  
35 settlements. A listing of all 26 census districts in each stratum was made and from  
36  
37 these districts a total of all 4845 EAs were listed for cities and towns, urban villages  
38  
39 and rural settlements. At the second stage, localities in cities and towns, urban  
40  
41 villages and rural villages were randomly selected. At the third and fourth stage a  
42  
43 random selection of EAs and households, respectively was made. Lastly, individuals  
44  
45 aged 15 years and over were selected for interview from the list of households with  
46  
47 persons 15 years and over. The NCD study questionnaire was developed using the  
48  
49 instruments from the WHO Study on Global Ageing and Adult Health (SAGE), and  
50  
51 WHO STEPS Surveys.  
52  
53  
54  
55  
56  
57  
58  
59  
60

1  
2  
3 All ethical clearance procedures were followed before the start of the study. The  
4 study proposal along with the necessary documents were submitted to and approved  
5 by the Institutional Review Board of the University of Botswana. Approval for  
6 conducting the study was also obtained from the Government of Botswana through  
7 the Ministry of Health and Wellness (MoHW).  
8  
9  
10  
11  
12  
13  
14

15 As part of the study protocol, all respondents were requested to sign a consent form  
16 and were told that participation in the study was voluntary. For participants aged 15-  
17 17 years written consent was obtained from the parents or guardians. All individuals  
18 aged 15 years and above who had successfully completed the NCD study  
19 questionnaire were included in the analysis for this study. Privacy and confidentiality  
20 of highest standard were maintained by treating all respondents as anonymous and  
21 no names of respondents are mentioned or implied when presenting findings of the  
22 study.  
23  
24  
25  
26  
27  
28  
29  
30  
31  
32  
33

### 34 ***Definitions and Measurement of variables***

35  
36  
37 The outcome variable for the study is overweight/obesity. Body Mass Index (BMI)  
38 was used to classify overweight/obesity. BMI was derived from weight and height:  
39  $\text{weight (kg) / (height (m) x height (m))}^1$ . The Charder MS7301 250Kg digital scale  
40 and the Muac measuring tape were used for anthropometric measurements. Weight  
41 was measured, to the nearest 0.1kg, while height was measured in metres. BMI was  
42 categorized into: underweight ( $\text{BMI} < 18.5 \text{ kg/m}^2$ ), normal weight ( $18.5 \leq \text{BMI} < 25$   
43  $\text{kg/m}^2$ ), overweight ( $25 \leq \text{BMI} < 30 \text{ kg/m}^2$ ) and obese ( $\text{BMI} \geq 30 \text{ kg/m}^2$ )<sup>1</sup>. Overweight  
44 and obese were used to create a binary outcome variable which was coded as:  
45 being overweight/obese ( $\text{BMI} \geq 25 \text{ kg/m}^2$ ) =1; not overweight/obese =0 ( $\text{BMI} < 25$   
46  $\text{kg/m}^2$ ).  
47  
48  
49  
50  
51  
52  
53  
54  
55  
56  
57  
58  
59  
60

1  
2  
3 Information on NCD risk factors was collected through self-reports. Respondents  
4 were asked questions on NCD risk factors such as tobacco use, alcohol  
5 consumption, physical activity and fruit and vegetable consumption. For tobacco use,  
6 respondents were asked whether they currently smoke tobacco products and their  
7 response was coded as yes=1 and no=0. Alcohol consumption was measured based  
8 on the intensity of alcohol consumed in the past 30 days. Respondents who had  
9 consumed alcohol in the past 30 days were asked about the number of standard  
10 alcohol drinks they had each day in the past 7 days and if they reported to have had  
11 three or more drinks per day (of approximately 60g alcohol) it was considered to be  
12 excessive drinking=1 and 0=otherwise.  
13  
14  
15  
16  
17  
18  
19  
20  
21  
22  
23  
24  
25

26 Based on WHO recommendations poor physical activity was calculated using an  
27 average typical types of activity undertaken<sup>13</sup>. It was calculated based on the time  
28 taken while doing physical activity in the past 7 days. Respondents were asked  
29 whether they do any moderate to rigorous intensity activities for at least 10 minutes  
30 continuously. This was considered for the domains of work and walking (includes at  
31 work and at home, walking to travel from place to place, and any other walking for  
32 recreation, sport, exercise, or leisure). Based on the time taken on work and walking  
33 the respondents were grouped into four categories of: no activity, low, moderate and  
34 high activity levels to show the intensity of their physical activity. The resultant  
35 variable was coded such that no and low activity (<10 minutes of physical activity) =1  
36 and moderate and high activity (≥10 minutes of physical activity) were coded=0.  
37  
38  
39  
40  
41  
42  
43  
44  
45  
46  
47  
48  
49  
50  
51

52 Poor fruit and vegetables consumption was created when an individual reported daily  
53 consumption of less than the recommended 5 servings of fruits and vegetables.  
54 Respondents reported the number of servings for fruits/vegetables they had in a  
55  
56  
57  
58  
59  
60

1  
2  
3 typical day, and if the servings were less than 5 in a day, they were considered to be  
4  
5 having poor fruit/vegetable consumption<sup>13, 27, 28</sup>.  
6  
7

8 A wealth index (WI) was constructed to be a measure of wealth status. WI is a  
9  
10 composite measure of ownership of consumer durables, housing characteristics, and  
11  
12 access to public services<sup>16</sup>. Information on a range of durable assets was collected  
13  
14 during the survey (e. g. car, refrigerator, television), housing characteristics (e. g.  
15  
16 material of dwelling floor and roof, main cooking fuel), access to basic services (e. g.  
17  
18 electricity supply, source of drinking water, sanitation facilities) and ownership of  
19  
20 livestock (e.g. cattle, goats, sheep, horses, chickens). Further to collection of  
21  
22 information on durable assets, information on ownership of land was also collected.  
23  
24  
25  
26  
27  
28  
29  
30  
31  
32  
33  
34  
35  
36  
37  
38  
39  
40  
41  
42  
43  
44  
45  
46  
47  
48  
49  
50  
51  
52  
53  
54  
55  
56  
57  
58  
59  
60  
Principal component analysis was employed to derive the wealth index variable,  
which had five categories from the 1<sup>st</sup> to the 5<sup>th</sup> quintile (poorest to richest).

### **Control variables**

Age and place of residence were used as control variables. These variables were conceptualized to have an association with the outcome variable. Therefore, as control variables they are included in the net effects model, so that the association between the independent variables of interest becomes isolated and discernible.

### **Statistical analysis**

Descriptive and multivariable logistic analysis were used. Descriptive analysis provided bivariate association of explanatory and outcome variable for further exploration of key determinants of overweight and obesity in Botswana. In the multivariable binary logistic regression, the outcome variable was coded as '1' if respondents were overweight/obese and '0' if they were not overweight/obese. Results of logistic regression analysis were presented together with adjusted odd

1  
2  
3 ratios (AOR), 95% confidence intervals (CI) and 5% statistical significance level. Chi-  
4 square test was used for bivariate analysis. Data analysis was done using SPSS  
5 version 25 program. Since this was a population based study representative of the  
6 population, selection bias was minimal and missing cases were few. In order to  
7 control for cluster effects, complex sample module in SPSS has been used.  
8  
9  
10  
11  
12  
13

### 14 ***Patient and Public involvement***

15  
16  
17  
18 No patients were involved in developing the research question, outcome measures  
19 and overall design of the study.  
20  
21  
22

## 23 **Results**

### 24 ***Sample characteristics***

25  
26  
27  
28  
29  
30 Table 1 presents socioeconomic characteristics of the respondents. The sample  
31 constituted a high proportion of females (69.1%) than males (30.9%). The sample  
32 age distribution suggests a relatively young population, with over half (59%) of the  
33 sample being less than 39 years of age, and almost three quarters (73.5%) being  
34 less than fifty years of age.  
35  
36  
37  
38  
39  
40  
41  
42  
43  
44  
45  
46  
47  
48  
49  
50  
51  
52  
53  
54  
55  
56  
57  
58  
59  
60

Table 1: Socio demographic characteristics

| Variable                                   | N           | %          |
|--------------------------------------------|-------------|------------|
| <b>Sex</b>                                 |             |            |
| Male                                       | 364         | 30.9       |
| Female                                     | 813         | 69.1       |
| <b>Total</b>                               | <b>1177</b> | <b>100</b> |
| <b>Age in years</b>                        |             |            |
| <24                                        | 270         | 26.4       |
| 25– 34                                     | 302         | 29.5       |
| 35 – 44                                    | 196         | 19.2       |
| 45– 54                                     | 130         | 12.7       |
| 55 – 64                                    | 75          | 7.3        |
| 65+ years                                  | 50          | 4.9        |
| <b>Total</b>                               | <b>1023</b> | <b>100</b> |
| <b>Locality Type</b>                       |             |            |
| Cities/Towns                               | 355         | 30.2       |
| Urban Villages                             | 534         | 45.4       |
| Rural Settlements                          | 288         | 24.5       |
| <b>Total</b>                               | <b>1177</b> | <b>100</b> |
| <b>Marital Status</b>                      |             |            |
| Never Married                              | 864         | 73.8       |
| Currently married                          | 199         | 17.0       |
| Formerly married                           | 108         | 9.2        |
| <b>Total</b>                               | <b>1171</b> | <b>100</b> |
| <b>Highest Level of Education Attained</b> |             |            |
| Primary or Less                            | 410         | 35.5       |
| Junior Secondary                           | 314         | 27.2       |
| Senior Secondary                           | 200         | 17.3       |
| Tertiary & Over                            | 230         | 19.9       |
| <b>Total</b>                               | <b>1154</b> | <b>100</b> |
| <b>Work Status in past 12 months</b>       |             |            |
| Public Sector                              | 122         | 10.5       |
| Private Sector                             | 182         | 15.7       |
| Self Employed                              | 130         | 11.2       |
| Not Employed                               | 436         | 37.5       |
| Homemaker-Student                          | 218         | 18.8       |
| Retired-Other                              | 74          | 6.4        |
| <b>Total</b>                               | <b>1162</b> | <b>100</b> |
| <b>Wealth status</b>                       |             |            |
| Lowest                                     | 234         | 19.9       |
| Second                                     | 237         | 20.1       |
| Middle                                     | 235         | 19.9       |
| Fourth                                     | 237         | 20.1       |
| Highest                                    | 235         | 19.9       |



|              |             |            |
|--------------|-------------|------------|
| <b>Total</b> | <b>1178</b> | <b>100</b> |
|--------------|-------------|------------|

More than two fifths (45.4%) of the population resided in urban villages; while one – third of them resided in cities and towns (30.2%), and a quarter of them lived in rural areas (24.5%). Almost three-fourth (73.8%) of respondents was never married; over a third (35.5%) had primary education or less; over a quarter (27.2%) had junior secondary education while just under a fifth had senior secondary education (17.3%) and tertiary education (19.9%). Close to two fifth (37.5%) respondents were not employed; over a quarter were employed in either the public or private sector (26.2%).

Table 2 shows behavioural characteristics of the study population. It shows that prevalence of alcohol consumption was estimated at 17.3% while tobacco smoking was estimated at 11.5%. Poor physical activity was also high in the study population with 48.9% of respondents indicating poor physical activity. Poor fruit and vegetable intake was estimated at 82.5%.

Table 2: Behavioural characteristics of the study population

| Variable                           | N           | %          |
|------------------------------------|-------------|------------|
| <b>Smoking</b>                     |             |            |
| Yes                                | 136         | 11.5       |
| No                                 | 1042        | 88.5       |
| <b>Total</b>                       | <b>1178</b> | <b>100</b> |
| <b>Alcohol consumption</b>         |             |            |
| Yes                                | 204         | 17.3       |
| No                                 | 974         | 82.7       |
| <b>Total</b>                       | <b>1178</b> | <b>100</b> |
| <b>Poor physical activity</b>      |             |            |
| Yes                                | 576         | 48.9       |
| No                                 | 602         | 51.1       |
| <b>Total</b>                       | <b>1178</b> | <b>100</b> |
| <b>Poor fruit/vegetable intake</b> |             |            |
| Yes                                | 1045        | 82.5       |
| No                                 | 133         | 17.5       |
| <b>Total</b>                       | <b>1178</b> | <b>100</b> |

### ***Prevalence of overweight/obesity***

Estimated prevalence of overweight/obesity in the study population was 41.3% (Table 3). There were significant gender differences in prevalence of overweight/obesity. It was found that women than men (48.6% among women, 25.5% among men) were overweight/obese. Individuals residing in rural areas (46.8%), public sector employees (55.2%) and those with low education (45%) showed high prevalence of overweight/obesity. Meanwhile it was found that wealth status was not significantly associated with overweight/obesity. Among the

1  
2  
3 behavioural factors, the prevalence of overweight/obesity was greater among non-  
4 smoker (42.9%). Alcohol consumption, poor physical activity and poor fruits and  
5 vegetable consumption did not show any significant association with  
6  
7  
8  
9  
10 overweight/obesity.  
11  
12  
13  
14  
15  
16  
17  
18  
19  
20  
21  
22  
23  
24  
25  
26  
27  
28  
29  
30  
31  
32  
33  
34  
35  
36  
37  
38  
39  
40  
41  
42  
43  
44  
45  
46  
47  
48  
49  
50  
51  
52  
53  
54  
55  
56  
57  
58  
59  
60

For peer review only

Table 3: Prevalence of overweight/obesity by socioeconomic and behavioural characteristics of the study population

| Variable              | N   | %    | P-value  |
|-----------------------|-----|------|----------|
| <b>Sex</b>            |     |      |          |
| Male                  | 364 | 25.5 | ≤0.001** |
| Female                | 813 | 48.6 |          |
| <b>Age</b>            |     |      | ≤0.001** |
| ≤24                   | 270 | 21.8 |          |
| 25-34                 | 302 | 36.8 |          |
| 35-44                 | 196 | 53.0 |          |
| 45-54                 | 130 | 54.5 |          |
| 55-64                 | 75  | 61.8 |          |
| 65+                   | 50  | 43.8 |          |
| <b>Marital status</b> |     |      | ≤0.001** |
| Never-married         | 864 | 35.5 |          |
| Currently-married     | 199 | 62.2 |          |
| Formerly-married      | 108 | 54.1 |          |
| <b>Education</b>      |     |      | 0.019**  |
| Primary or less       | 410 | 45.4 |          |
| Secondary             | 514 | 36.7 |          |
| Tertiary or higher    | 230 | 44.6 |          |
| <b>Residence</b>      |     |      | 0.008**  |
| Cities and towns      | 355 | 37.9 |          |
| Urban villages        | 534 | 41.0 |          |
| Rural villages        | 288 | 46.8 |          |
| <b>Work status</b>    |     |      | ≤0.001** |
| Public sector         | 122 | 52.2 |          |
| Private sector        | 182 | 36.8 |          |
| self-employed         | 130 | 55.0 |          |
| Not employed          | 436 | 45.8 |          |
| Home-maker/student    | 218 | 29.4 |          |
| Retired/other         | 74  | 40.3 |          |
| <b>Wealth status</b>  |     |      | 0.765    |
| Lowest                | 234 | 38.8 |          |
| second                | 237 | 43.2 |          |

|                                         |             |             |         |
|-----------------------------------------|-------------|-------------|---------|
| middle                                  | 235         | 41.1        |         |
| Fourth                                  | 237         | 39.7        |         |
| Highest                                 | 235         | 44.1        |         |
| <b>Alcohol consumption</b>              |             |             | 0.445   |
| No                                      | 766         | 33.3        |         |
| yes                                     | 412         | 37.7        |         |
| <b>Smoking</b>                          |             |             | 0.004** |
| Yes                                     | 136         | 29.7        |         |
| No                                      | 1042        | 42.9        |         |
| <b>Poor physical activity</b>           |             |             | 0.547   |
| Yes                                     | 376         | 41.5        |         |
| No                                      | 771         | 39.6        |         |
| <b>Poor fruit/vegetable consumption</b> |             |             | 0.832   |
| No                                      | 133         | 41.9        |         |
| yes                                     | 1045        | 43.0        |         |
| <b>Overall</b>                          | <b>1178</b> | <b>41.3</b> |         |

Note: \*\*Chi-square test statistically significant at  $p < 0.05$ .

### ***Determinants of overweight/obesity***

Three models were run to assess determinants of overweight/obesity (Table 4). Model I is the crude model and it assessed the association between overweight/obesity and each of the socioeconomic and demographic variables and behavioural factors independently, Model II assessed the association between overweight/obesity adjusting for socioeconomic factors only, while Model III examined the association between overweight/obesity adjusting for both socioeconomic and behavioural factors. It was observed that gender had a significant association with overweight/obesity when controlling for both socioeconomic and behavioural factors. Women were observed to have more than 2 times (AOR=2.74, 95% C.I. =1.92-3.90) greater odds for overweight/obesity than men.

1  
2  
3  
4  
5  
6 The odds of being overweight/obese increased with age after controlling for  
7 socioeconomic and behavioural factors and were highest among individuals aged  
8 55-64 years (AOR=5.53, 95% C.I. = 2.62-11.6). However, it declined at ages 65+  
9 years (AOR=2.88, 95% C.I. = 1.21-6.86). Education was also found to be a  
10 significant factor associated with overweight/obesity when controlling for  
11 socioeconomic and behavioural factors. Individuals who had secondary (AOR=1.70,  
12 95% C.I. = 1.11-2.61) and tertiary or higher education (AOR=1.99, 95% C.I. =1.16-  
13 3.38) were found to have higher probability of being overweight/obese than  
14 individuals with primary or less education. Work status and wealth status were not  
15 significantly associated with overweight/obesity.  
16  
17  
18  
19  
20  
21  
22  
23  
24  
25  
26  
27  
28

29 The association between smoking and alcohol consumption with overweight/obesity  
30 was found to be negative in the crude model. However, when controlling for other  
31 socioeconomic and demographic factors, the odds of overweight/obesity increased  
32 two times (AOR=2.16, 95% C.I. = 1.22-3.83) among smokers than non-smokers.  
33  
34  
35  
36  
37  
38  
39  
40  
41  
42  
43  
44  
45  
46  
47  
48  
49  
50  
51  
52  
53  
54  
55  
56  
57  
58  
59  
60  
61  
62  
63  
64  
65  
66  
67  
68  
69  
70  
71  
72  
73  
74  
75  
76  
77  
78  
79  
80  
81  
82  
83  
84  
85  
86  
87  
88  
89  
90  
91  
92  
93  
94  
95  
96  
97  
98  
99  
100  
101  
102  
103  
104  
105  
106  
107  
108  
109  
110  
111  
112  
113  
114  
115  
116  
117  
118  
119  
120  
121  
122  
123  
124  
125  
126  
127  
128  
129  
130  
131  
132  
133  
134  
135  
136  
137  
138  
139  
140  
141  
142  
143  
144  
145  
146  
147  
148  
149  
150  
151  
152  
153  
154  
155  
156  
157  
158  
159  
160  
161  
162  
163  
164  
165  
166  
167  
168  
169  
170  
171  
172  
173  
174  
175  
176  
177  
178  
179  
180  
181  
182  
183  
184  
185  
186  
187  
188  
189  
190  
191  
192  
193  
194  
195  
196  
197  
198  
199  
200  
201  
202  
203  
204  
205  
206  
207  
208  
209  
210  
211  
212  
213  
214  
215  
216  
217  
218  
219  
220  
221  
222  
223  
224  
225  
226  
227  
228  
229  
230  
231  
232  
233  
234  
235  
236  
237  
238  
239  
240  
241  
242  
243  
244  
245  
246  
247  
248  
249  
250  
251  
252  
253  
254  
255  
256  
257  
258  
259  
260  
261  
262  
263  
264  
265  
266  
267  
268  
269  
270  
271  
272  
273  
274  
275  
276  
277  
278  
279  
280  
281  
282  
283  
284  
285  
286  
287  
288  
289  
290  
291  
292  
293  
294  
295  
296  
297  
298  
299  
300  
301  
302  
303  
304  
305  
306  
307  
308  
309  
310  
311  
312  
313  
314  
315  
316  
317  
318  
319  
320  
321  
322  
323  
324  
325  
326  
327  
328  
329  
330  
331  
332  
333  
334  
335  
336  
337  
338  
339  
340  
341  
342  
343  
344  
345  
346  
347  
348  
349  
350  
351  
352  
353  
354  
355  
356  
357  
358  
359  
360  
361  
362  
363  
364  
365  
366  
367  
368  
369  
370  
371  
372  
373  
374  
375  
376  
377  
378  
379  
380  
381  
382  
383  
384  
385  
386  
387  
388  
389  
390  
391  
392  
393  
394  
395  
396  
397  
398  
399  
400  
401  
402  
403  
404  
405  
406  
407  
408  
409  
410  
411  
412  
413  
414  
415  
416  
417  
418  
419  
420  
421  
422  
423  
424  
425  
426  
427  
428  
429  
430  
431  
432  
433  
434  
435  
436  
437  
438  
439  
440  
441  
442  
443  
444  
445  
446  
447  
448  
449  
450  
451  
452  
453  
454  
455  
456  
457  
458  
459  
460  
461  
462  
463  
464  
465  
466  
467  
468  
469  
470  
471  
472  
473  
474  
475  
476  
477  
478  
479  
480  
481  
482  
483  
484  
485  
486  
487  
488  
489  
490  
491  
492  
493  
494  
495  
496  
497  
498  
499  
500  
501  
502  
503  
504  
505  
506  
507  
508  
509  
510  
511  
512  
513  
514  
515  
516  
517  
518  
519  
520  
521  
522  
523  
524  
525  
526  
527  
528  
529  
530  
531  
532  
533  
534  
535  
536  
537  
538  
539  
540  
541  
542  
543  
544  
545  
546  
547  
548  
549  
550  
551  
552  
553  
554  
555  
556  
557  
558  
559  
560  
561  
562  
563  
564  
565  
566  
567  
568  
569  
570  
571  
572  
573  
574  
575  
576  
577  
578  
579  
580  
581  
582  
583  
584  
585  
586  
587  
588  
589  
590  
591  
592  
593  
594  
595  
596  
597  
598  
599  
600  
601  
602  
603  
604  
605  
606  
607  
608  
609  
610  
611  
612  
613  
614  
615  
616  
617  
618  
619  
620  
621  
622  
623  
624  
625  
626  
627  
628  
629  
630  
631  
632  
633  
634  
635  
636  
637  
638  
639  
640  
641  
642  
643  
644  
645  
646  
647  
648  
649  
650  
651  
652  
653  
654  
655  
656  
657  
658  
659  
660  
661  
662  
663  
664  
665  
666  
667  
668  
669  
670  
671  
672  
673  
674  
675  
676  
677  
678  
679  
680  
681  
682  
683  
684  
685  
686  
687  
688  
689  
690  
691  
692  
693  
694  
695  
696  
697  
698  
699  
700  
701  
702  
703  
704  
705  
706  
707  
708  
709  
710  
711  
712  
713  
714  
715  
716  
717  
718  
719  
720  
721  
722  
723  
724  
725  
726  
727  
728  
729  
730  
731  
732  
733  
734  
735  
736  
737  
738  
739  
740  
741  
742  
743  
744  
745  
746  
747  
748  
749  
750  
751  
752  
753  
754  
755  
756  
757  
758  
759  
760  
761  
762  
763  
764  
765  
766  
767  
768  
769  
770  
771  
772  
773  
774  
775  
776  
777  
778  
779  
780  
781  
782  
783  
784  
785  
786  
787  
788  
789  
790  
791  
792  
793  
794  
795  
796  
797  
798  
799  
800  
801  
802  
803  
804  
805  
806  
807  
808  
809  
810  
811  
812  
813  
814  
815  
816  
817  
818  
819  
820  
821  
822  
823  
824  
825  
826  
827  
828  
829  
830  
831  
832  
833  
834  
835  
836  
837  
838  
839  
840  
841  
842  
843  
844  
845  
846  
847  
848  
849  
850  
851  
852  
853  
854  
855  
856  
857  
858  
859  
860  
861  
862  
863  
864  
865  
866  
867  
868  
869  
870  
871  
872  
873  
874  
875  
876  
877  
878  
879  
880  
881  
882  
883  
884  
885  
886  
887  
888  
889  
890  
891  
892  
893  
894  
895  
896  
897  
898  
899  
900  
901  
902  
903  
904  
905  
906  
907  
908  
909  
910  
911  
912  
913  
914  
915  
916  
917  
918  
919  
920  
921  
922  
923  
924  
925  
926  
927  
928  
929  
930  
931  
932  
933  
934  
935  
936  
937  
938  
939  
940  
941  
942  
943  
944  
945  
946  
947  
948  
949  
950  
951  
952  
953  
954  
955  
956  
957  
958  
959  
960  
961  
962  
963  
964  
965  
966  
967  
968  
969  
970  
971  
972  
973  
974  
975  
976  
977  
978  
979  
980  
981  
982  
983  
984  
985  
986  
987  
988  
989  
990  
991  
992  
993  
994  
995  
996  
997  
998  
999  
1000

Table 4: Odds ratios (OR) from multivariable logistic regression for overweight/obesity among adults in the study population, Botswana.

| Variable              | Model I |             | Model II |             | Model III |             |
|-----------------------|---------|-------------|----------|-------------|-----------|-------------|
|                       | OR      | C.I.        | OR       | C.I.        | OR        | C.I.        |
| <b>Sex</b>            |         |             |          |             |           |             |
| Male                  | 1.00    |             | 1.00     |             | 1.00      |             |
| Female                | 2.75**  | (2.08-3.64) | 3.01**   | (2.12-4.26) | 2.74**    | (1.92-3.90) |
| <b>Age</b>            |         |             |          |             |           |             |
| ≤24                   | 1.00    |             | 1.00     |             | 1.00      |             |
| 25-34                 | 2.08**  | (1.42-3.03) | 1.77**   | (1.12-2.77) | 1.83**    | (1.17-2.88) |
| 35-44                 | 4.02**  | (2.67-6.08) | 3.70**   | (2.23-6.12) | 3.87**    | (2.34-6.42) |
| 45-54                 | 4.28**  | (2.70-6.78) | 3.04**   | (1.66-5.55) | 3.26**    | (1.78-5.98) |
| 55-64                 | 5.78**  | (3.26-10.2) | 4.91**   | (2.35-10.2) | 5.53**    | (2.62-11.6) |
| 65+                   | 2.78**  | (1.46-5.28) | 2.74**   | (1.15-6.50) | 2.88**    | (1.21-6.86) |
| <b>Marital status</b> |         |             |          |             |           |             |
| Never-married         | 0.46**  | (0.30-0.71) | 0.68     | (0.34-1.34) | 0.66      | (0.33-1.32) |
| Currently-married     | 1.39    | (0.84-2.29) | 1.34     | (0.66-2.71) | 1.28      | (0.63-2.61) |
| Formerly-married      | 1.00    |             | 1.00     |             | 1.00      |             |
| <b>Education</b>      |         |             |          |             |           |             |
| Primary or less       | 1.00    |             | 1.00     |             | 1.00      |             |
| Secondary             | 0.69**  | (0.53-0.91) | 0.49**   | (0.29-0.83) | 1.70**    | (1.11-2.61) |
| Tertiary or higher    | 0.96    | (0.69-1.35) | 0.87     | (0.58-1.32) | 1.99**    | (1.16-3.38) |
| <b>Residence</b>      |         |             |          |             |           |             |
| Cities and towns      | 1.00    |             | 1.00     |             | 1.00      |             |
| Urban villages        | 1.13    | (0.86-1.50) | 1.06     | (0.74-1.50) | 1.07      | (0.75-1.52) |
| Rural villages        | 1.44**  | (1.04-1.99) | 1.37     | (0.88-2.12) | 1.37      | (0.88-2.12) |
| <b>Work status</b>    |         |             |          |             |           |             |
| Public sector         | 1.61    | (0.89-2.93) | 1.30     | (0.64-2.65) | 1.22      | (0.59-2.50) |
| Private sector        | 0.86    | (0.49-1.51) | 1.20     | (0.61-2.36) | 1.19      | (0.60-2.35) |
| self-employed         | 1.18    | (0.65-2.13) | 1.24     | (0.61-2.51) | 1.29      | (0.63-2.62) |
| Not employed          | 1.25    | (0.75-2.08) | 1.30     | (0.70-2.40) | 1.30      | (0.70-2.41) |
| Home-maker/student    | 0.61    | (0.35-1.07) | 0.96     | (0.48-1.92) | 0.96      | (0.48-1.92) |
| Retired/other         | 1.00    |             | 1.00     |             | 1.00      |             |
| <b>Wealth status</b>  |         |             |          |             |           |             |
| Lowest                | 0.80    | (0.55-1.17) | 0.60     | (0.34-1.05) | 1.03      | (0.64-1.68) |
| second                | 0.96    | (0.66-1.40) | 0.67     | (0.40-1.11) | 1.12      | (0.68-1.85) |
| middle                | 0.88    | (0.60-1.28) | 0.73     | (0.45-1.19) | 1.20      | (0.71-2.01) |
| Fourth                | 0.83    | (0.57-1.21) | 0.79     | (0.50-1.23) | 1.53      | (0.87-2.69) |

|                                         |                   |      |                    |
|-----------------------------------------|-------------------|------|--------------------|
| Highest                                 | 1.00              | 1.00 | 1.00               |
| <b>Smoking</b>                          |                   | N.I  |                    |
| Yes                                     | 0.56* (0.37-0.83) |      | 2.16** (1.22-3.83) |
| No                                      | 1.00              |      | 1.00               |
| <b>Poor physical activity</b>           |                   | N.I  |                    |
| Yes                                     | 1.08 (0.83-1.40)  |      | 1.46** (1.03-3.24) |
| No                                      | 1.00              |      | 1.00               |
| <b>Poor fruit/vegetable consumption</b> |                   | N.I  |                    |
| Yes                                     | 0.82 (0.55-1.22)  |      | 0.80 (0.28-2.24)   |
| no                                      | 1.00              |      | 1.00               |
| <b>Alcohol consumption</b>              |                   | N.I  |                    |
| Yes                                     | 0.66* (0.47-0.91) |      | 1.23 (0.53-2.83)   |
| No                                      | 1.00              |      | 1.00               |

N.I- not included, Model I: Crude model; Model II: socioeconomic variables included; Model III: socioeconomic + behavioural characteristics included. \*\*statistically significant at  $p < 0.05$ .



## Discussion

The prevalence of overweight/obesity in the study population was 41.3%. Botswana also seems to have joined with other Southern African countries where the national prevalence rates ranges between 30% and 60% among adults age 15 years and over<sup>10, 26-31</sup>. Nutrition transition from high-fibre, low-calorie diets rich in fruits and vegetables to refined, energy-dense foods high in fat, calories, sweeteners and salt<sup>12</sup> and low physical activity coupled with transition from agrarian to a sedentary industrial society contributes to a greater risk of overweight/obesity in Botswana<sup>32</sup>.

Gender differences in overweight/obesity found in this study is a well-established finding and is consistent with most previous studies<sup>33-34</sup>. Congruent with most studies in developing countries women were found to have higher odds of overweight/obesity than men<sup>35-37</sup>. This is contrary to findings from some developed countries such as United States (US) and United Kingdom (UK) where it was found that adult men tend to be overweight/obese than adult women<sup>38-42</sup>. In developing countries such as Botswana, adult women are generally noted to be overweight/obese than adult men at all ages<sup>26, 35, 39-40</sup>.

In the context of Botswana, gender differences in overweight/obesity can be explained by sociocultural dynamics and complex sociocultural pathways that encourage weight gain among women<sup>26, 40</sup>. For example, cultural values favour larger body size among women as a sign of fertility, healthfulness, or prosperity in Botswana<sup>26</sup>. In this study, women reported lower levels of physical activity which may also contribute to higher prevalence of overweight/obesity among them.

1  
2  
3 Overweight/obesity was highest among individuals aged 55-64 years but declined at  
4 ages 65+ years. This finding corroborates data from large scale surveys<sup>43-46</sup> which  
5 show that mean body weight and BMI gradually increases during most of adult life  
6 and reach peak values at 50–59 years of age in both men and women and after the  
7 age of 60 years, mean body weight and BMI tend to decrease<sup>47-49</sup>. Similarly in South  
8 Africa it was found that overweight/obesity tends to increase with age<sup>21</sup>.  
9  
10  
11  
12  
13  
14  
15  
16  
17  
18  
19

20 Education differences were also observed for overweight/obesity. Individuals who  
21 had high educational attainment had higher odds of overweight/obesity than those  
22 with low education. This is consistent with other studies that have shown that  
23 education is associated with overweight/obesity via socioeconomic status, literacy  
24 and health behaviours<sup>50-52</sup>.  
25  
26  
27  
28  
29  
30  
31  
32  
33

34 There was no significant association observed between overweight/obesity and work  
35 status and for wealth status. Other studies in neighbouring countries with  
36 comparable Human Development Index (HDI) as Botswana including Namibia and  
37 South Africa<sup>27-28</sup> have also shown no wealth or work status differences in  
38 overweight/obesity. There are several reasons to such scenario. These reasons  
39 include; rapid and disorganized urbanization, increasing sedentary lifestyles, easy  
40 access to and consumption of unhealthy food and high energy drinks among both  
41 the poor and non-poor in these countries<sup>21, 27-28</sup>. Further to this a general observation  
42 has been made by Ford et al.<sup>52</sup> that overweight/obesity is no longer an issue of  
43 affluence in majority of low and middle income countries.  
44  
45  
46  
47  
48  
49  
50  
51  
52  
53  
54  
55  
56  
57  
58  
59  
60

1  
2  
3 Further, the study noted that the odds of overweight/obesity were two times greater  
4 among smokers than non-smokers. Tuovinen *et al.*<sup>41</sup> based on literature review  
5 observed that heavy smokers tend to have greater body weight than do light  
6 smokers or non-smokers, which likely reflect a clustering of other risky behaviours  
7 (e.g. low level of physical activity and poor diet) that are conducive to weight gain<sup>23-</sup>  
8  
9  
10  
11  
12  
13  
14  
15  
16  
17  
18  
19  
20  
21  
22  
23  
24  
25  
26  
27  
28  
29  
30  
31  
32  
33  
34  
35  
36  
37  
38  
39  
40  
41  
42  
43  
44  
45  
46  
47  
48  
49  
50  
51  
52  
53  
54  
55  
56  
57  
58  
59  
60  
24. On the other hand, some studies have shown that smoking tends to suppress  
appetite leading to low BMI among smokers<sup>10, 21, 30</sup>.

Other important finding in this study is that overweight/obesity was significantly  
associated with poor physical activity. This is consistent with other studies which  
have shown that a decline in physical activity leads to adiposity<sup>52</sup>. The interpretation  
of this finding is that Botswana has undergone a transition from an agrarian to  
industrial society due to urbanization subsequently leading to industrial modernity.  
As a result there is an increase in poor physical activity in the general population<sup>24</sup>.  
Poor physical activity leads to overweight/obesity through energy imbalance between  
calories consumed and calories expended<sup>52</sup>. Generally formal physical activity that is  
planned, structured, repetitive and purposeful is not common in Botswana. Thus in  
order to increase physical activity and reduce overweight/obesity there is need for a  
population-based, multi-sectoral, multi-disciplinary and culturally relevant approach.

This study benefits from data collected from a large and randomly selected sample  
of respondents. The data contained information on potential confounding factors,  
with a low proportion of missing information making the study more comparable.  
Given that the recall period for behavioural risk factors such as smoking, alcohol  
consumption, poor physical activity and poor fruit and vegetable consumption was

1  
2  
3 30 days or less there were minimal chances of recall bias. The main limitation is that  
4  
5 since the study used a cross sectional design, it was not possible to establish the  
6  
7 causal relationship between explanatory variables and overweight/obesity.  
8  
9  
10 Furthermore, the NCDs study sample was not designed to be representative of the  
11  
12 whole of Botswana. However, the findings of this study give an indication of  
13  
14 emerging patterns of overweight/obesity in the country.  
15  
16

## 17 **Conclusion**

18  
19  
20 In conclusion our findings indicate high prevalence of overweight/obesity in the adult  
21  
22 population of Botswana. Overweight/obesity was found to be significantly high  
23  
24 among women, older adults and people with higher education levels. Behavioural  
25  
26 factors such as smoking and poor physical activity were found to be key correlates of  
27  
28 overweight/obesity. These results demonstrate that socioeconomic and behavioural  
29  
30 factors play an important role in prevalence of overweight/obesity. Botswana's  
31  
32 multisectoral national strategic plan implementation framework for combating NCDs  
33  
34 should focus on developing a community based and people centered awareness  
35  
36 about the harmful impact of smoking, alcohol, physically inactivity and poor quality of  
37  
38 diet facilitated by comprehensive national monitoring and evaluation framework.  
39  
40  
41  
42  
43  
44  
45  
46  
47  
48  
49  
50  
51  
52  
53  
54  
55  
56  
57  
58  
59  
60

## Acknowledgments

We wish to thank University of Botswana for affording us the time and resources to undertake this study. This paper is a part of the larger study on “Chronic Non communicable Diseases in Botswana: Chronic disease prevalence, Health Care Utilization, Health Expenditure and the Life course (NCD study)” funded by the Office of Research of Development (ORD) at the University of Botswana. The authors wish to thank ORD for the financial support. We also wish to thank the study participants.

## Contributors

This paper is a part of the larger NCD study which was designed, conceived and developed by the study team (MK, KN, GL, KB, SDR, LG, TM and RM). MK did the analysis and wrote the initial draft of this paper. KN, GL and SDR gave feedbacks for revising the first draft. MK, KN and GL worked on the reviewers comments. All authors have reviewed and approved the final version of the manuscript except KB who recently passed away. We dedicate this article to KB whom we miss very much.

## Funding

The ‘Chronic Non communicable Diseases in Botswana: Chronic disease prevalence, Health Care Utilization, Health Expenditure and the Life course’ survey was supported by Office of Research and Development, through Round 28 Research Funding, University of Botswana.

## Disclaimer

The funding body had no role in the design of the study, analyses, interpretation or decision to submit the manuscript for publication.

## Competing Interests

Nil

## Participant consent

Obtained

## Ethics Approval

All ethical clearance formalities were completed before the start of the study. The study proposal along with the necessary documents was submitted to and approved by the Institutional Review Board of the University of Botswana (Ref #: UBR/RES/IRB/1583) and the Ministry of Health and Wellness (Ref #: HPDME: 13/18/1 Vol. X (130)). Privacy and confidentiality of highest standard were maintained by treating all respondents as anonymous and no names of respondents are mentioned or implied when presenting findings of the study.

## Data sharing statement

The dataset used and/or analysed during the current study is available from the corresponding author (Mpho Keetile) on reasonable request to the Office of Research and Development, University of Botswana.

## References

1. World Health Organization. The global status of overweight and obesity. *Fact Sheet*. Geneva. 2016.
2. Musaiger AO, Al-Hazzaa HM. Prevalence and risk factors associated with nutrition-related noncommunicable diseases in the Eastern Mediterranean region. *Int J Gen Med*. 2012;5:199-217.
3. Baldwin W, Kaneda T, Amato L, *et al*. Noncommunicable diseases and youth: a critical window of opportunity for Latin America and the Caribbean. Washington, DC: *Population Reference Bureau*; 2013.
4. Bhurosy T, Jeewon R. Overweight and obesity epidemic in developing countries: a problem with diet, physical activity, or socioeconomic status?. *ScientificWorldJournal*. 2014;964236. doi:10.1155/2014/964236.
5. Ford ND, Patel SA, Narayan KMV. Obesity in Low- and Middle-Income Countries: Burden, Drivers, and Emerging Challenges. *Annu. Rev. Public Health*. 2017; 38:145–64.
6. Amugsi DA, Dimbuene ZT, Mberu B, *et al*. Prevalence and time trends in overweight and obesity among urban women: an analysis of demographic and health surveys data from 24 African countries, 1991–2014. *BMJ*;7:e017344. doi:10.1136/bmjopen-2017-017344.
7. Hruby A, Hu FB. The Epidemiology of Obesity: A Big Picture. *Pharmacoeconomics*. 2015;33(7):673-89.
8. Mamun AA , Finlay JE. Shifting of under-nutrition to over-nutrition and its determinants among women of reproductive ages in the 36 low to medium income countries. *Obes Res Clin Pract*. 2015; 9: 75-86.

- 1  
2  
3 9. Micklesfield LK, Lambert EV, Hume DJ, *et al.* Socio-cultural, environmental  
4 and behavioural determinants of obesity in black South African women.  
5  
6 *Cardiovasc J Afr.* 2013;24(9-10):369-75.  
7  
8  
9  
10 10. Biadgilign S, Mgutshini T, Haile D, *et al.* Epidemiology of obesity and  
11 overweight in sub-Saharan Africa: a protocol for a systematic review and  
12 meta-analysis. *BMJ Open.* 2017;7(11):e017666.  
13  
14  
15  
16  
17 11. Ball GD, Mushquash AR, Keaschuk RA, *et al.* Using intervention mapping to  
18 develop the Parents as Agents of Change (PAC) intervention for managing  
19 pediatric obesity. *BMC Res Notes.* 2017;10:43.  
20  
21  
22  
23  
24 12. Kelly AS, Barlow SE, Rao G, *et al.* Severe obesity in children and  
25 adolescents: identification, associated health risks, and treatment  
26 approaches: a scientific statement from the American Heart Association.  
27  
28 *Circulation.* 2013;128:1689–712.  
29  
30  
31  
32  
33 13. World Health Organization (WHO). Obesity and overweight. *World Health*  
34 *Organization, Geneva.* 2016.  
35  
36  
37  
38  
39 14. Levine JA. Poverty and obesity in the U.S. *Diabetes.* 2011; 60:2667-2668.  
40  
41  
42  
43 15. Kim J, Sharma SV, Park SK. Association between socioeconomic status and  
44 obesity in adults: evidence from the 2001 to 2009 Korea national health and  
45 nutrition examination survey. *J Prev Med Public Health.* 2014;47(2):94-  
46  
47  
48  
49 103.16.  
50  
51  
52 16. Vyas S, Kumaranayake L, Constructing socio-economic status indices: how  
53 to use principal components analysis, *Health Policy and Planning.* 2006;  
54  
55  
56 21(6), 459–468. <https://doi.org/10.1093/heapol/czl029>.  
57  
58  
59  
60



- 1  
2  
3 17. Maffetone PB, Laursen PB. The Prevalence of Overfat Adults and Children in  
4 the US. *Front Public Health*. 2017;5:290.  
5  
6  
7  
8  
9 18. Lumsden MA, Hor K. Impact of obesity on the health of women in midlife. *The*  
10 *Obstetrician & Gynaecologist*. 2015; 17 (1):201–8.  
11  
12  
13 19. Kim TJ, von dem Knesebeck O. Income and obesity: what is the direction of  
14 the relationship? A systematic review and meta-analysis. *BMJ Open*.  
15 2018;8(1):e019862.  
16  
17  
18  
19 20. Hong I, Coker-Bolt P, Anderson KR, *et al*. Relationship Between Physical  
20 Activity and Overweight and Obesity in Children: Findings From the 2012 National  
21 Health and Nutrition Examination Survey National Youth Fitness Survey. *Am J*  
22 *Occup Ther*. 2016; 70(5):7005180060p1-8.  
23  
24  
25  
26 21. Popkin BM, Slining MM. New dynamics in global obesity facing low- and  
27 middle-income countries. *Obesity Reviews: An Official Journal of the International*  
28 *Association for the Study of Obesity*. 2013; 14(02), 11–20.  
29 <http://doi.org/10.1111/obr.12102>.  
30  
31  
32  
33 22. Dare S, Mackay DF, Pell JP. Relationship between Smoking and Obesity: A  
34 Cross-Sectional Study of 499,504 Middle-Aged Adults in the UK General  
35 Population. *PLoS ONE*. 2015; 10(4).  
36  
37  
38  
39 23. Tuovinen EL, Saarni SE, Männistö S. *et al*. Smoking status and abdominal  
40 obesity among normal- and overweight/obese adults: Population-based FINRISK  
41 study. *Preventive Medicine Reports*. 2016;4(1), 324–330.  
42  
43  
44  
45 24. Keetile M, Letamo G, Navaneetham K. Patterns and determinants of  
46 hypertension in Botswana, *J Public Health*. 2015; 23(1),311–318.  
47  
48  
49  
50  
51  
52  
53  
54  
55  
56  
57  
58  
59  
60

- 1  
2  
3 25. Republic of Botswana. Chronic Disease Risk Surveillance Report 2010-  
4  
5 Ministry of Health & WHO. *Government Printers*. 2010.  
6  
7  
8 26. Letamo G. The prevalence of, and factors associated with, overweight and  
9 obesity in Botswana. *J Biosoc Sci*. 2011; 43(1):75-84.  
10  
11  
12  
13 27. Peltzer K, Phaswana-Mafuya N. Fruit and vegetable intake and associated  
14 factors in older adults in South Africa. *Global Health Action*, 2012; 5(1), 1-8.  
15 doi:10.3402/gha.v5i0.18668.  
16  
17  
18 28. Nnyepi MS, Gwisai N, Lekgoa M, *et al*. Evidence of nutrition transition in  
19 Southern Africa. *Proc Nutr*. 2015;17 (1):1–9.doi: 10.1017/S0029665115000051.  
20  
21  
22  
23 29. World Health Organization (WHO). Obesity and overweight. *World Health*  
24 *Organization*, Geneva. 2015.  
25  
26  
27  
28 30. GBD 2015 Risk Factors Collaborators. Global, regional, and national  
29 comparative risk assessment of 79 behavioural, environmental and occupational,  
30 and metabolic risks or clusters of risks, 1990-2015: a systematic analysis for the  
31 Global Burden of Disease Study 2015. *Lancet*. 2016;388 (1):1659–724.  
32  
33  
34  
35  
36  
37  
38 31. Agymang C, Boatemaa S, Frempong-Agymang G, *et al*. Obesity in Sub  
39 Saharan Africa. Metabolic Syndrome. *Springer International Publishing*,  
40 Switzerland. Ed. Rexford Ahima. 2015.41-53.  
41  
42  
43  
44  
45 32. Amoah AG. Socio-demographic variations in obesity among Ghanain adults.  
46 *Public Health Nutr*. 2003;6 (1):751-757.  
47  
48  
49  
50 33. Biadgilign S, Mgutshini T, Haile D, *et al*. Epidemiology of obesity and  
51 overweight in sub-Saharan Africa: a protocol for a systematic review and meta-  
52 analysis. *BMJ Open*. 2017;7(11).  
53  
54  
55  
56  
57 34. Cohen AK, Rai M, Rehkopf DH, *et al*. Educational attainment and obesity: A  
58 systematic review. *Obesity Reviews: An Official Journal of the International*  
59  
60

1  
2  
3 *Association for the Study of Obesity*, 2013; 14(12), 989–1005.  
4  
5 <http://doi.org/10.1111/obr.12062>.  
6  
7

8 35. Kanter R, Caballero B. Global Gender Disparities in Obesity: A Review of  
9 American Society for Nutrition. *Adv. Nutr.* 2012;3 (1): 491–498.  
10  
11 doi:10.3945/an.112.002063.  
12  
13

14 36. Li L, Gower BA, Shelton RC, *et al.* Gender-Specific Relationship between  
15 Obesity and Major Depression. *Front Endocrinol (Lausanne)*. 2017;8 (1):292.  
16  
17

18 37. Pinto KA, Griep RH, Rotenberg L, *et al.* Correction: Gender, time use and  
19 overweight and obesity in adults: Results of the Brazilian Longitudinal Study of  
20 Adult Health (ELSA-Brasil). *PLOS ONE* 2018;13(8): e0198380.  
21  
22  
23

24 38. Luppino FS, de Wit LM, Bouvy PF, *et al.* Overweight, obesity, and  
25 depression: a systematic review and meta-analysis of longitudinal studies. *Arch*  
26 *Gen Psychiatry*. 2010; 67(1):220–9.  
27  
28

29 39. The GBD 2015 Obesity Collaborators. Health Effects of Overweight and  
30 Obesity in 195 Countries over 25 Years. *N Engl J Med* 2017; 377:13-27.  
31  
32

33 40. Kamadjeu RM, Edwards R, Atanga JS, *et al.* Anthropometry measures and  
34 prevalence of obesity in the urban adult population of Cameroon: an update from  
35 the Cameroon Burden of Diabetes Baseline Survey. *BMC Public Health*. 2006;6:  
36  
37  
38  
39  
40  
41  
42  
43  
44  
45  
46  
47  
48  
49  
50  
51  
52  
53  
54  
55  
56  
57  
58  
59  
60  
228.

41. Tuovinen EL, Saarni SE, Männistö S, *et al.* Smoking status and abdominal  
obesity among normal- and overweight/obese adults: Population-based FINRISK  
study. *Prev Med Rep.* 2016; 4:324–330.

- 1  
2  
3 42. Flegal KM, Carroll MD, Kuczmarski RJ, *et al.* Overweight and obesity in the  
4 United States: prevalence and trends, 1960–1994. *Int J Obes Relat Metab*  
5 *Disord*; 1998; 22 (1):39–47.  
6  
7  
8  
9  
10 43. Villareal DT, Apovian CM, Kushner RF, *et al.* Obesity in older adults:  
11 technical review and position statement of the American Society for Nutrition and  
12 NAASO, The Obesity Society, *The American Journal of Clinical Nutrition*. 2005 82  
13 (5), 923–934  
14  
15  
16  
17  
18  
19  
20 44. Sperrin M, Marshall AD, Higgins V, *et al.* Body mass index relates weight to  
21 height differently in women and older adults: serial cross-sectional surveys in  
22 England (1992-2011). *J Public Health (Oxf)*. 2016;38(3):607-613.  
23  
24  
25  
26  
27 45. Vazquez G, Duval S, Jacobs DR, *et al.* Comparison of Body Mass Index,  
28 Waist Circumference, and Waist/Hip Ratio in Predicting Incident Diabetes: A  
29 Meta-Analysis, *Epidemiologic Reviews*. 2007; 29(1).115–128.  
30  
31  
32  
33  
34 46. Emerging Risk Factors Collaboration, Wormser D, Kaptoge S, *et al.*  
35 Separate and combined associations of body-mass index and abdominal  
36 adiposity with cardiovascular disease: collaborative analysis of 58 prospective  
37 studies. *Lancet*. 2011;377(9771):1085-95.  
38  
39  
40  
41  
42  
43  
44 47. Morio B, Barra V, Ritz P. *et al.* Benefit of endurance training in elderly people  
45 over a short period is reversible. *Eur J Appl Physiol* 2000; 81(1): 329.  
46  
47  
48  
49 48. Fletcher J, Frisvold D. Higher education and health investments: Does more  
50 schooling affect preventive health care use. *Journal Capital*. 2009; 3(2):144–176.  
51  
52  
53  
54 49. Cohen AK, Rai M, Rehkopf DH, *et al.* Educational attainment and obesity: a  
55 systematic review. *Obes Rev*. 2013;14(12):989-1005.  
56  
57  
58  
59  
60

1  
2  
3 50. Devaux M, Sassi F, Church J, *et al.* “Exploring the Relationship between  
4 Education and Obesity”, *OECD Journal: Economic Studies*. 2011(1):121-159.  
5  
6

7  
8 51. Traversy G, Jean-Philippe C. Alcohol Consumption and Obesity: An Update,  
9  
10 *Curr Obes Rep*. 2015; 4 (1):122–130.  
11

12  
13 52. Ford ND, Patel SA, Narayan KM. Obesity in Low- and Middle-Income  
14 Countries: Burden, Drivers, and Emerging Challenges. *Annu Rev Public Health*.  
15  
16 2017;20(38):145-164.  
17  
18  
19  
20  
21  
22  
23  
24  
25  
26  
27  
28  
29  
30  
31  
32  
33  
34  
35  
36  
37  
38  
39  
40  
41  
42  
43  
44  
45  
46  
47  
48  
49  
50  
51  
52  
53  
54  
55  
56  
57  
58  
59  
60

**STROBE 2007 (v4) Statement—Checklist of items that should be included in reports of *cross-sectional studies***

| Section/Topic                | Item # | Recommendation                                                                                                                                                                       | Reported on page # |
|------------------------------|--------|--------------------------------------------------------------------------------------------------------------------------------------------------------------------------------------|--------------------|
| <b>Title and abstract</b>    | 1      | (a) Indicate the study’s design with a commonly used term in the title or the abstract                                                                                               | 2                  |
|                              |        | (b) Provide in the abstract an informative and balanced summary of what was done and what was found                                                                                  | 2-3                |
| <b>Introduction</b>          |        |                                                                                                                                                                                      |                    |
| Background/rationale         | 2      | Explain the scientific background and rationale for the investigation being reported                                                                                                 | 4-5                |
| Objectives                   | 3      | State specific objectives, including any prespecified hypotheses                                                                                                                     | 6                  |
| <b>Methods</b>               |        |                                                                                                                                                                                      |                    |
| Study design                 | 4      | Present key elements of study design early in the paper                                                                                                                              | 6                  |
| Setting                      | 5      | Describe the setting, locations, and relevant dates, including periods of recruitment, exposure, follow-up, and data collection                                                      | 7                  |
| Participants                 | 6      | (a) Give the eligibility criteria, and the sources and methods of selection of participants                                                                                          | 7                  |
| Variables                    | 7      | Clearly define all outcomes, exposures, predictors, potential confounders, and effect modifiers. Give diagnostic criteria, if applicable                                             | 7-9                |
| Data sources/<br>measurement | 8*     | For each variable of interest, give sources of data and details of methods of assessment (measurement). Describe comparability of assessment methods if there is more than one group | 7-9                |
| Bias                         | 9      | Describe any efforts to address potential sources of bias                                                                                                                            | 10                 |
| Study size                   | 10     | Explain how the study size was arrived at                                                                                                                                            |                    |
| Quantitative variables       | 11     | Explain how quantitative variables were handled in the analyses. If applicable, describe which groupings were chosen and why                                                         | n/a                |
| Statistical methods          | 12     | (a) Describe all statistical methods, including those used to control for confounding                                                                                                | 9                  |
|                              |        | (b) Describe any methods used to examine subgroups and interactions                                                                                                                  | n/a                |
|                              |        | (c) Explain how missing data were addressed                                                                                                                                          | 10                 |
|                              |        | (d) If applicable, describe analytical methods taking account of sampling strategy                                                                                                   | 10                 |
|                              |        | (e) Describe any sensitivity analyses                                                                                                                                                | n/a                |
| <b>Results</b>               |        |                                                                                                                                                                                      |                    |

|                          |     |                                                                                                                                                                                                              |       |
|--------------------------|-----|--------------------------------------------------------------------------------------------------------------------------------------------------------------------------------------------------------------|-------|
| Participants             | 13* | (a) Report numbers of individuals at each stage of study—eg numbers potentially eligible, examined for eligibility, confirmed eligible, included in the study, completing follow-up, and analysed            | 11    |
|                          |     | (b) Give reasons for non-participation at each stage                                                                                                                                                         | -     |
|                          |     | (c) Consider use of a flow diagram                                                                                                                                                                           | -     |
| Descriptive data         | 14* | (a) Give characteristics of study participants (eg demographic, clinical, social) and information on exposures and potential confounders                                                                     | 11    |
|                          |     | (b) Indicate number of participants with missing data for each variable of interest                                                                                                                          | 11    |
| Outcome data             | 15* | Report numbers of outcome events or summary measures                                                                                                                                                         | -     |
| Main results             | 16  | (a) Give unadjusted estimates and, if applicable, confounder-adjusted estimates and their precision (eg, 95% confidence interval). Make clear which confounders were adjusted for and why they were included | 16-19 |
|                          |     | (b) Report category boundaries when continuous variables were categorized                                                                                                                                    | -     |
|                          |     | (c) If relevant, consider translating estimates of relative risk into absolute risk for a meaningful time period                                                                                             | -     |
| Other analyses           | 17  | Report other analyses done—eg analyses of subgroups and interactions, and sensitivity analyses                                                                                                               | -     |
| <b>Discussion</b>        |     |                                                                                                                                                                                                              |       |
| Key results              | 18  | Summarise key results with reference to study objectives                                                                                                                                                     | 20-22 |
| Limitations              | 19  | Discuss limitations of the study, taking into account sources of potential bias or imprecision. Discuss both direction and magnitude of any potential bias                                                   | 22-23 |
| Interpretation           | 20  | Give a cautious overall interpretation of results considering objectives, limitations, multiplicity of analyses, results from similar studies, and other relevant evidence                                   | 23    |
| Generalisability         | 21  | Discuss the generalisability (external validity) of the study results                                                                                                                                        | 23    |
| <b>Other information</b> |     |                                                                                                                                                                                                              |       |
| Funding                  | 22  | Give the source of funding and the role of the funders for the present study and, if applicable, for the original study on which the present article is based                                                | 24    |

\*Give information separately for cases and controls in case-control studies and, if applicable, for exposed and unexposed groups in cohort and cross-sectional studies.

**Note:** An Explanation and Elaboration article discusses each checklist item and gives methodological background and published examples of transparent reporting. The STROBE checklist is best used in conjunction with this article (freely available on the Web sites of PLoS Medicine at <http://www.plosmedicine.org/>, Annals of Internal Medicine at <http://www.annals.org/>, and Epidemiology at <http://www.epidem.com/>). Information on the STROBE Initiative is available at [www.strobe-statement.org](http://www.strobe-statement.org).
